# Supplementary material for: Tuning the solid-state emission of liquid crystalline nitro-cyanostilbene by halogen bonding
Source: publisher site journal article supplement (doi:10.3762/bjoc.17.13), 2021-01-14
Supplement: Additional file 1 [file 1860-5397-17-13-S1.pdf]

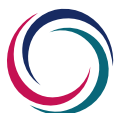

## Supporting Information

for

### **Tuning the solid-state emission of liquid crystalline nitro-cyanostilbene by halogen bonding**

Subrata Nath, Alexander Kappelt, Matthias Spengler, Bibhisan Roy, Jens Voskuhl and Michael Giese

*Beilstein J. Org. Chem.* **2021**, *17*, 124–131. [doi:10.3762/bjoc.17.13](https://doi.org/10.3762/bjoc.17.13)

### **Detailed descriptions of the experimental procedures and comprehensive analytical data**

## 1. Materials and methods

Compounds and solvents were used as obtained from suppliers without further purification.  $^1\text{H}$  and  $^{13}\text{C}$  NMR spectra of the intermediates and products were recorded in deuterated solvents ( $\text{CDCl}_3$ ,  $\text{DMSO}-d_6$  or  $\text{MeOD}$ ) with a Bruker DRX 300. Mass spectra were obtained with a Bruker amaZon (MS) and IR spectra were recorded with a Varian 3100 FT-IR, Excalibur Series, ATR IR spectrometer. Polarized optical microscopy (POM) images/videos were taken on a Nikon Eclipse *Ni* equipped with an OptixCam Summit K2 OCS-D3K4-14-52X microscope camera and an LTS420 hotstage from Linkam Scientific Instruments Ltd. The images were recorded by an Imaging Source camera OptixCam K2. DSC thermograms were recorded using a Mettler Toledo DCS3+/700/866/Argon with a heating/cooling speed of  $10\text{ }^\circ\text{C}/\text{min}$  (sample weight  $\approx 5\text{ mg}$ ). UV-visible spectroscopy was performed using a Thermo Fisher Evolution 201 spectrophotometer.

### Experimental procedures

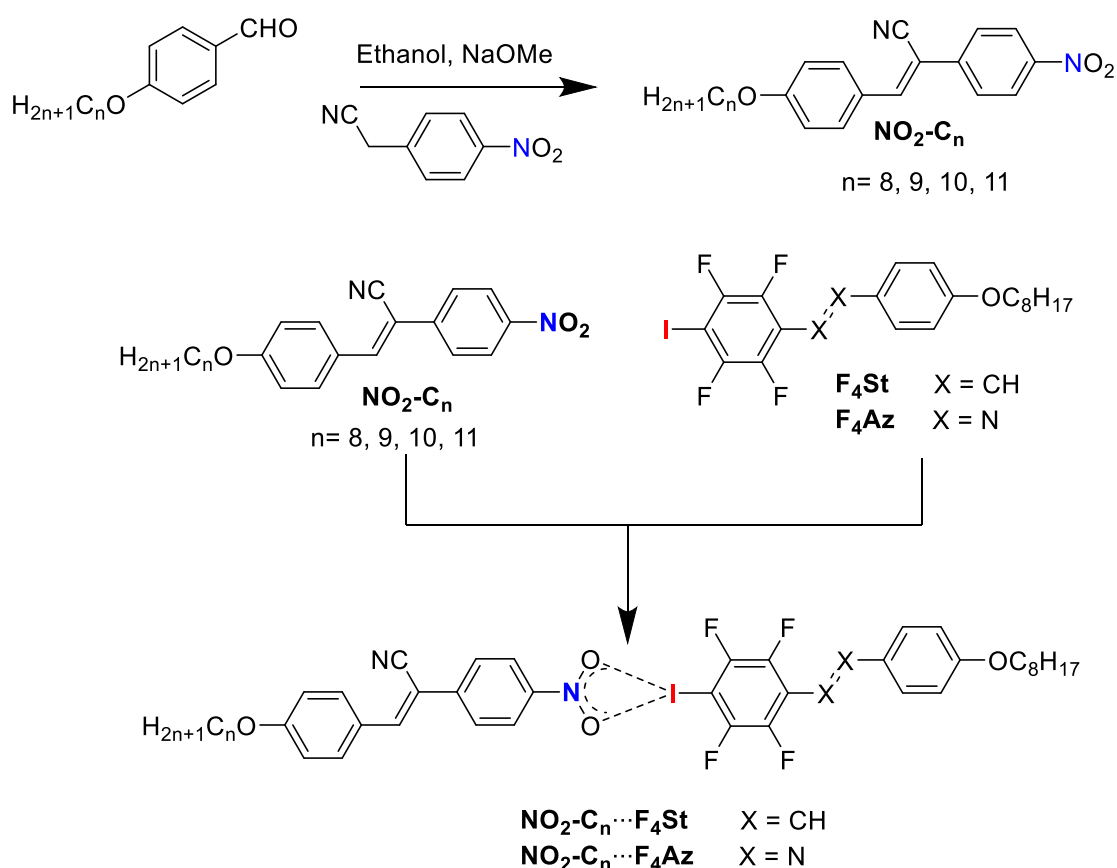

**Scheme S1:** The synthetic route for the synthesis of XB-acceptors, XB-donors and supramolecular assemblies.

### Synthesis of compound $\text{NO}_2-\text{C}_n$ ( $n = 1, 8, 9, 10, 11$ ):

The desired compounds were synthesised based on a reported procedure<sup>S1</sup> with a small modification. 4-Alkoxybenzaldehyde (1 equiv),  $\text{CH}_3\text{ONa}$  (1 equiv) and 20 ml ethanol were placed into a 250 ml boiling flask. When the 4-alkoxybenzaldehyde and  $\text{CH}_3\text{ONa}$  had completely dissolved in ethanol, 4-nitrophenylacetonitrile (1 equiv) was added and the

mixture was stirred at 25 °C for 8 h. The final reaction mixture was filtered, the solid products were collected and washed several times with ethanol to obtain the yellow green solid products with a yield of 60–65%.

**NO<sub>2</sub>-C<sub>1</sub>**: <sup>1</sup>H NMR (CDCl<sub>3</sub>, 300 MHz, ppm): δ 8.30-8.26 (m, 2H), 7.96 (d, *J* = 9Hz, 2H), 7.83-7.80 (m, 2H), 7.61 (s, 1H), 7.02 (d, *J* = 9Hz, 2H), 3.89 (s, 3H, 1×CH<sub>3</sub>); <sup>13</sup>C (CDCl<sub>3</sub>, 75 MHz, ppm): δ 162.6, 147.7, 145.2, 141.3, 132.1, 126.5, 125.9, 124.5, 117.9, 114.8, 106.4, 55.7.

FT-IR (ATR):  $\tilde{\nu}$  (cm<sup>-1</sup>) = 2978, 2843, 2212, 1597, 1579, 1508, 1381, 1334, 1311, 1261, 1180, 1034, 922, 848, 825, 752, 686, 621.

HRMS *m/z* (%): positive: calc. (M+Na<sup>+</sup>): C<sub>16</sub>H<sub>12</sub>N<sub>2</sub>NaO<sub>3</sub><sup>+</sup> = 303.0740, found: 303.0749.

**NO<sub>2</sub>-C<sub>8</sub>**: <sup>1</sup>H NMR (CDCl<sub>3</sub>, 300 MHz, ppm): δ 8.31-8.28 (m, 2H), 7.94 (d, *J* = 9Hz, 2H), 7.83-7.80 (m, 2H), 7.60 (s, 1H), 7.0 (d, *J* = 9Hz, 2H), 4.04 (t, *J* = 6 Hz, 2H, OCH<sub>2</sub>), 1.84-1.77 (m, 2H, 1×CH<sub>2</sub>), 1.54-1.30 (m, 10H, 5×CH<sub>2</sub>), 0.89 (t, *J* = 6Hz, 3H, 1×CH<sub>3</sub>); <sup>13</sup>C NMR (CDCl<sub>3</sub>, 75 MHz, ppm): δ 161.5, 146.7, 140.2, 132.0, 130.3, 126.6, 125.1, 124.6, 115.4, 115.1, 109.3, 68.5, 32.0, 29.5, 29.4, 29.3, 26.2, 22.9, 14.3.

FT-IR (ATR):  $\tilde{\nu}$  (cm<sup>-1</sup>) = 2962, 2920, 2854, 2212, 1578, 1508, 1333, 1311, 1259, 1198, 1180, 1110, 1039, 997, 914, 850, 825, 752, 688, 629.

HRMS *m/z* (%): positive: calc. (M+Na<sup>+</sup>): C<sub>23</sub>H<sub>26</sub>N<sub>2</sub>NaO<sub>3</sub><sup>+</sup>: 401.1836, found: 401.1844.

**NO<sub>2</sub>-C<sub>9</sub>**: <sup>1</sup>H NMR (CDCl<sub>3</sub>, 300 MHz, ppm): δ 8.30-8.27 (m, 2H), 7.94 (d, *J* = 9Hz, 2H), 7.84-7.80 (m, 2H), 7.60 (s, 1H), 7.01-6.98 (m, 2H), 4.04 (t, *J* = 6 Hz, 2H, OCH<sub>2</sub>), 1.86-1.77 (m, 2H, 1×CH<sub>2</sub>), 1.52-1.29 (m, 12H, 6×CH<sub>2</sub>), 0.89 (t, *J* = 6Hz, 3H, 1×CH<sub>3</sub>); <sup>13</sup>C NMR (CDCl<sub>3</sub>, 75 MHz, ppm): δ 162.3, 147.7, 145.3, 141.4, 132.2, 126.6, 125.7, 124.6, 118.0, 115.4, 106.2, 68.6, 32.1, 29.7, 29.6, 29.5, 29.3, 26.2, 22.9, 14.3.

FT-IR (ATR):  $\tilde{\nu}$  (cm<sup>-1</sup>) = 2920, 2852, 2214, 1575, 1508, 1472, 1375, 1335, 1311, 1263, 1197, 1177, 1108, 1015, 917, 880, 849, 832, 751, 687, 623.

HRMS *m/z* (%): positive: calc. (M+Na<sup>+</sup>): C<sub>24</sub>H<sub>28</sub>N<sub>2</sub>NaO<sub>3</sub><sup>+</sup>: 415.1992, found: 415.2003.

**NO<sub>2</sub>-C<sub>10</sub>**: <sup>1</sup>H NMR (CDCl<sub>3</sub>, 300 MHz, ppm): δ 8.29 (d, *J* = 9Hz, 2H) 7.94 (d, *J* = 9Hz, 2H), 7.94-7.79 (m, 2H), 7.60 (s, 1H), 6.99 (d, 2H), 4.04 (t, *J* = 6 Hz, 2H, OCH<sub>2</sub>), 1.86-1.77 (m, 2H, 1×CH<sub>2</sub>), 1.47-1.29 (m, 14H, 7×CH<sub>2</sub>), 0.89 (t, *J* = 6Hz, 3H, 1×CH<sub>3</sub>); <sup>13</sup>C NMR (CDCl<sub>3</sub>, 75 MHz, ppm): δ 162.3, 147.7, 145.3, 141.4, 132.2, 126.5, 125.7, 124.5, 118.0, 115.3, 106.1, 68.6, 32.1, 29.8, 29.6, 29.5, 29.3, 26.2, 22.9, 14.3.

FT-IR (ATR):  $\tilde{\nu}$  (cm<sup>-1</sup>) = 2960, 2918, 2850, 2210, 1599, 1578, 1506, 1469, 1333, 1309, 1255, 1179, 1107, 1047, 1020, 993, 914, 850, 823, 796, 752, 717, 688, 607.

HRMS *m/z* (%): positive: calc. (M+Na<sup>+</sup>): C<sub>25</sub>H<sub>30</sub>N<sub>2</sub>NaO<sub>3</sub><sup>+</sup>: 429.2149, found: 429.2157.

**NO<sub>2</sub>-C<sub>11</sub>**: <sup>1</sup>H NMR (CDCl<sub>3</sub>, 300 MHz, ppm): δ 8.30-8.27 (m, 2H), 7.94 (d, *J* = 9Hz, 2H), 7.84-7.80 (m, 2H), 7.60 (s, 1H), 7.02-6.98 (m, 2H), 4.04 (t, *J* = 6 Hz, 2H, OCH<sub>2</sub>), 1.84-1.79 (m, 2H, 1×CH<sub>2</sub>), 1.47-1.29 (m, 16H, 8×CH<sub>2</sub>), 0.91-0.86 (m, 3H, 1×CH<sub>3</sub>); <sup>13</sup>C NMR (CDCl<sub>3</sub>, 75 MHz, ppm): δ 162.3,

147.5, 145.3, 141.4, 132.2, 126.5, 125.7, 124.5, 118.0, 115.4, 106.2, 68.6, 32.1, 29.8, 29.8, 29.7, 29.6, 29.5, 29.3, 26.2, 22.9, 14.3.

FT-IR (ATR):  $\nu$  (cm<sup>-1</sup>) = 2916, 2850, 2216, 1604, 1585, 1516, 1465, 1433, 1379, 1340, 1309, 1271, 1178, 1115, 1066, 1026, 989, 945, 918, 881, 847, 825, 750, 719, 684, 627.

HRMS  $m/z$  (%): positive: calc. (M+Na<sup>+</sup>): C<sub>26</sub>H<sub>32</sub>N<sub>2</sub>NaO<sub>3</sub><sup>+</sup>: 443.2305, found: 443.2316.

### Synthesis of the complexes NO<sub>2</sub>-C<sub>n</sub>...F<sub>4</sub>St & NO<sub>2</sub>-C<sub>n</sub>...F<sub>4</sub>Az:

CH<sub>2</sub>Cl<sub>2</sub> solutions of compound **NO<sub>2</sub>-C<sub>n</sub>** and compound **F<sub>4</sub>St/F<sub>4</sub>Az**<sup>S2,S3</sup> were mixed in a 1:1 molar ratio. The solvent was allowed to evaporate overnight followed by subsequent drying under vacuum to give an orange solid.

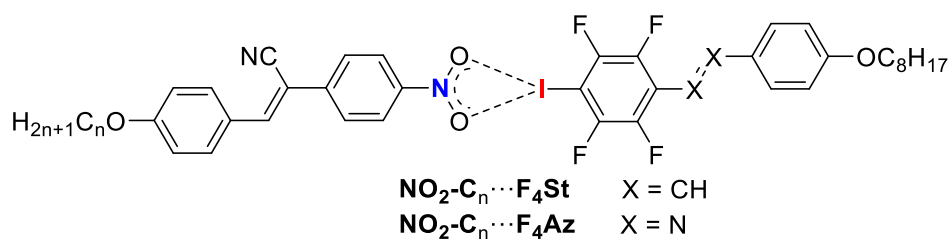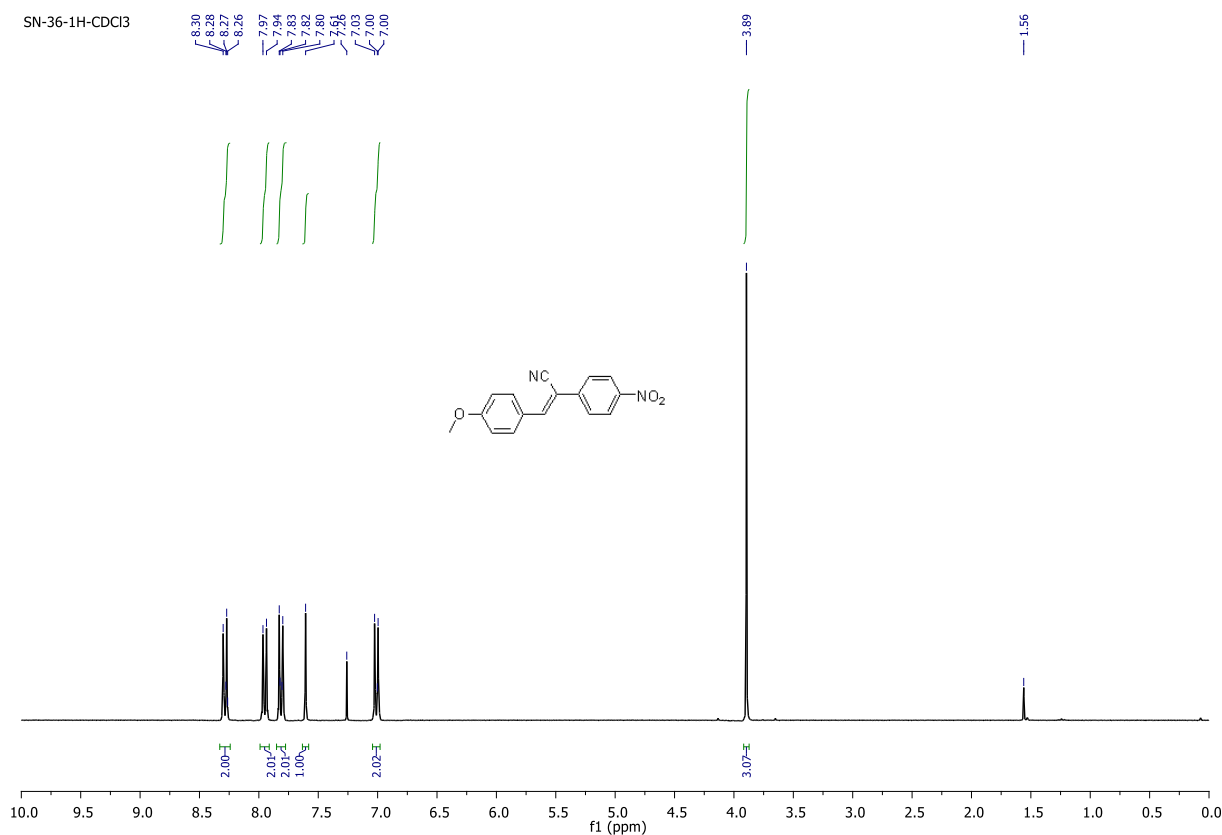

**Figure S1:** <sup>1</sup>H NMR (300 MHz) spectrum of **NO<sub>2</sub>-C<sub>1</sub>** in CDCl<sub>3</sub>.

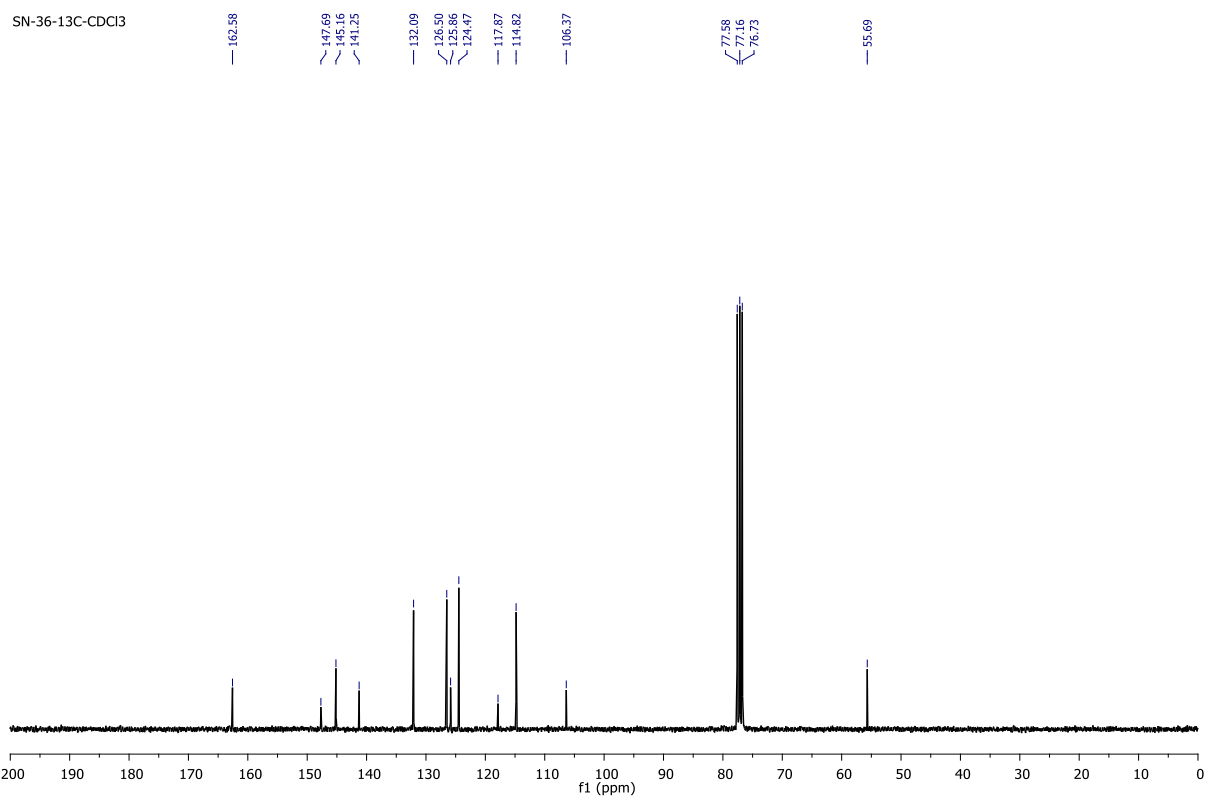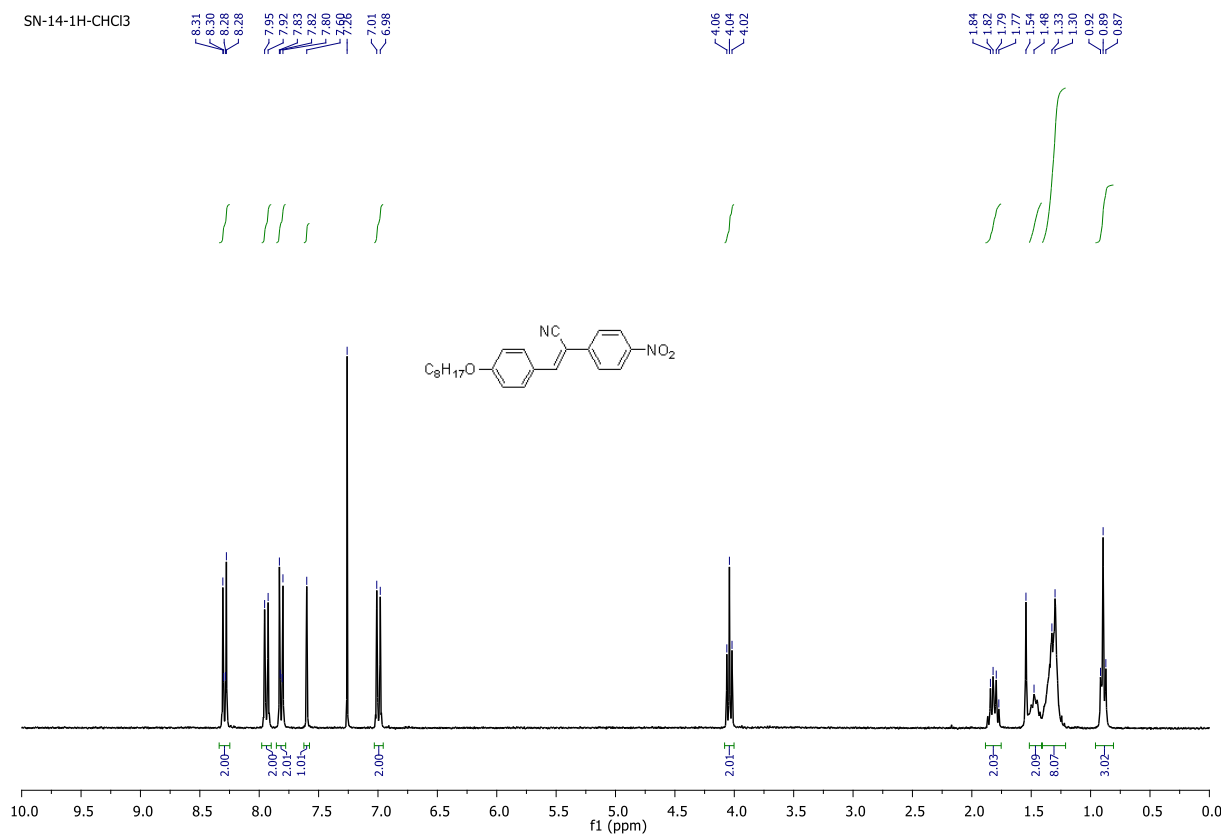

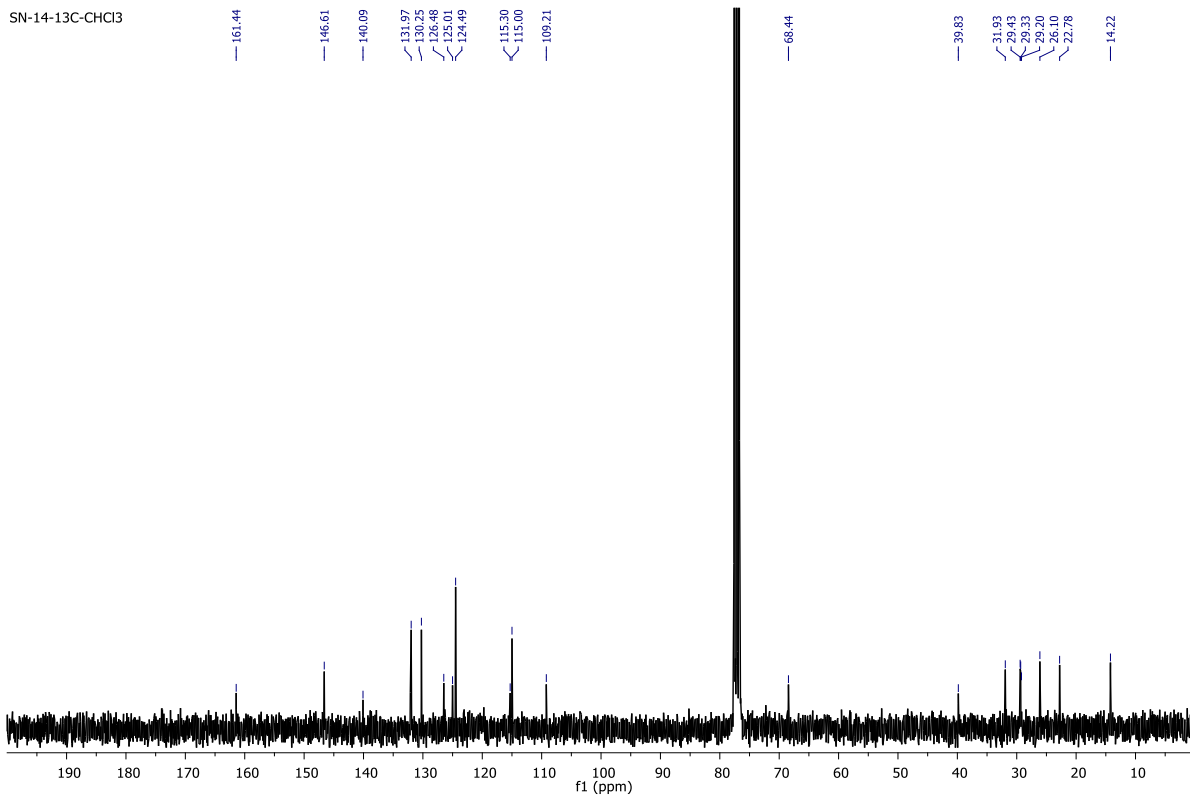

Figure S4:  $^{13}\text{C}$  NMR (75 MHz) spectrum of  $\text{NO}_2\text{-C}_8$  in  $\text{CDCl}_3$ .

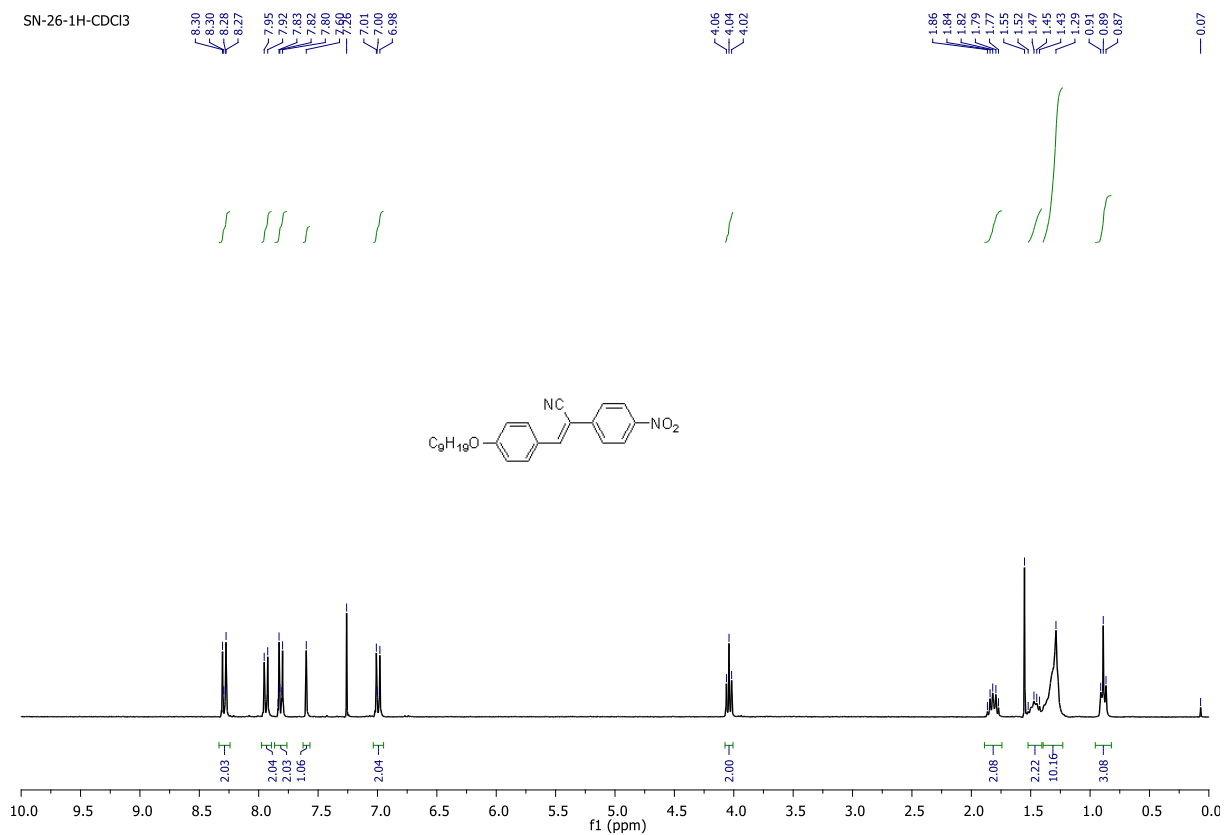

Figure S5:  $^1\text{H}$  NMR (300 MHz) spectrum of  $\text{NO}_2\text{-C}_9$  in  $\text{CDCl}_3$ .

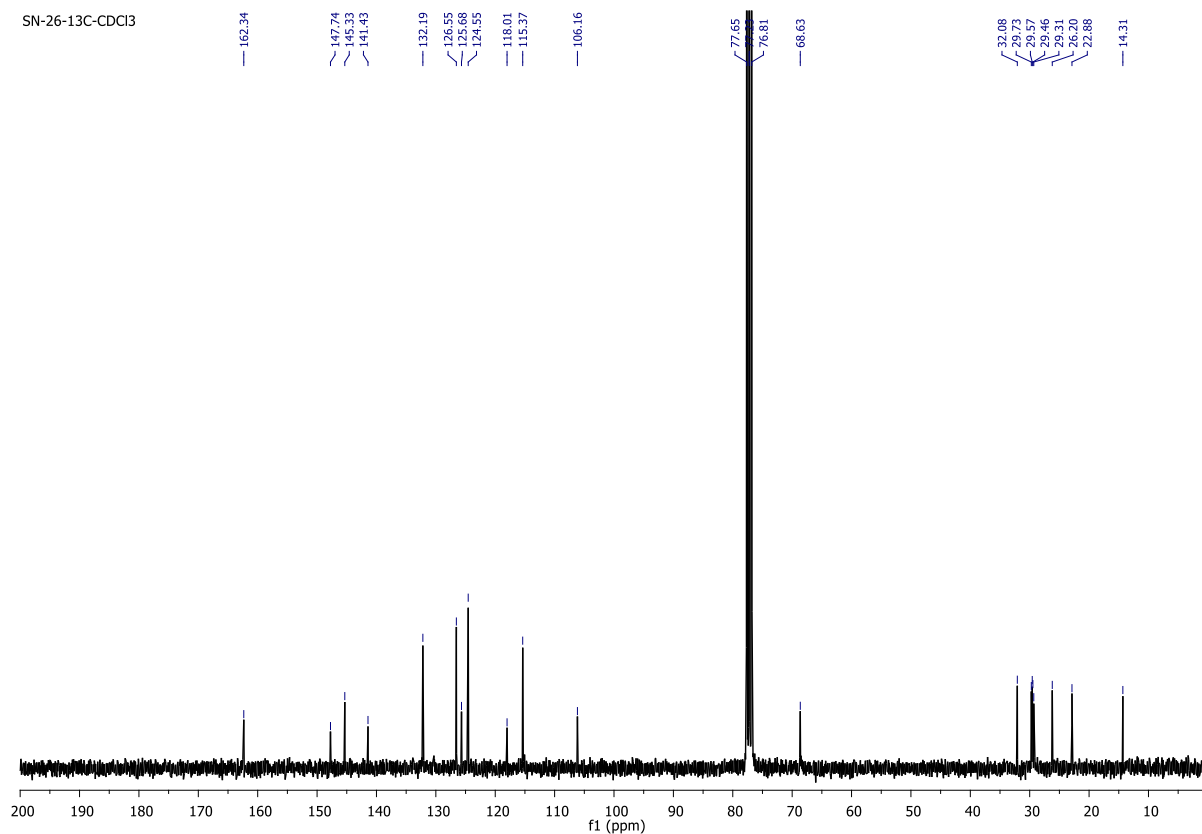

Figure S6:  $^{13}\text{C}$  NMR (75 MHz) spectrum of  $\text{NO}_2\text{-C}_9$  in  $\text{CDCl}_3$ .

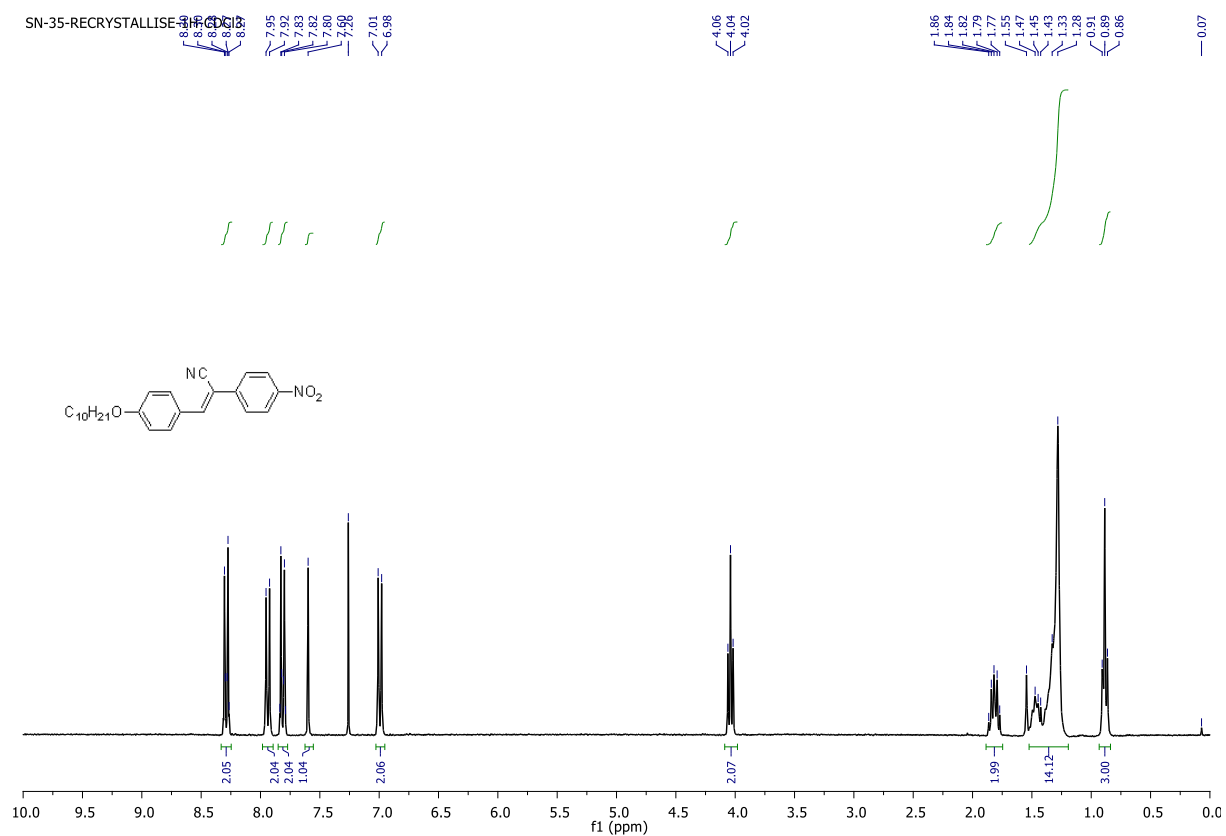

Figure S7:  $^1\text{H}$  NMR (300 MHz) spectrum of  $\text{NO}_2\text{-C}_{10}$  in  $\text{CDCl}_3$ .

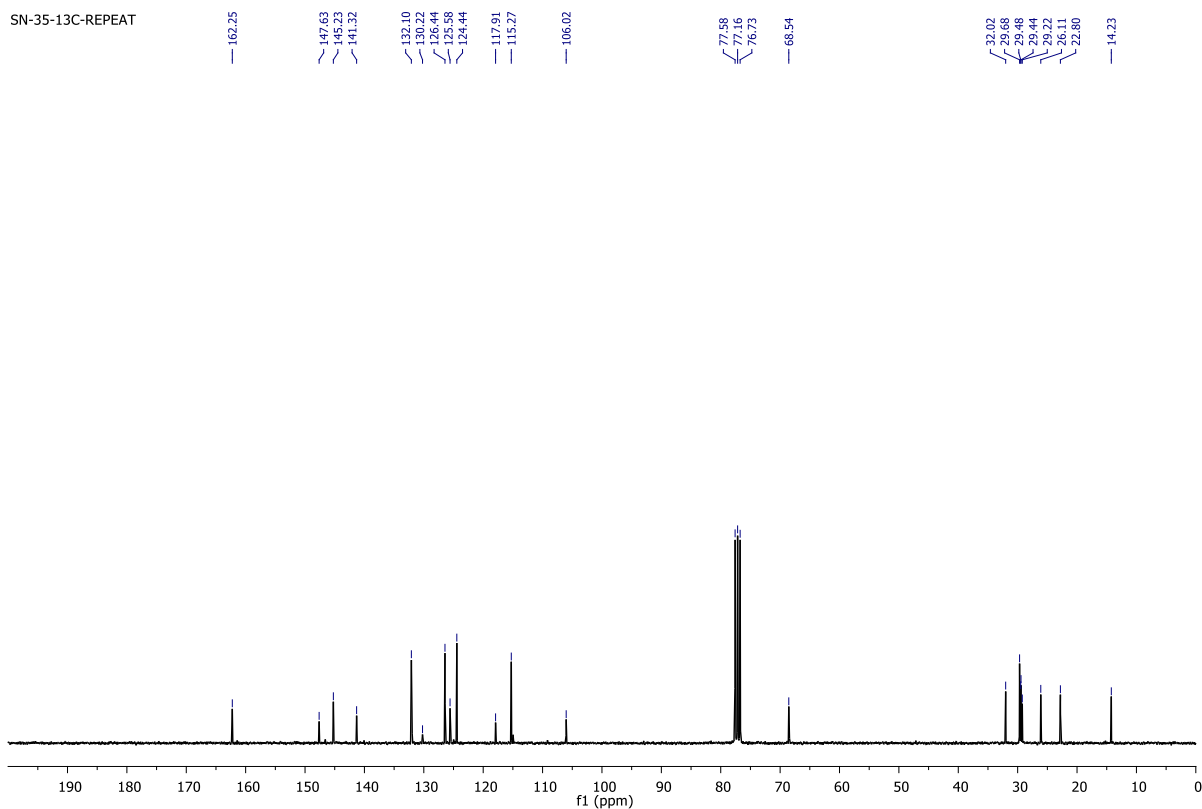

Figure S8:  $^{13}\text{C}$  NMR (75 MHz) spectrum of  $\text{NO}_2\text{-C}_{10}$  in  $\text{CDCl}_3$ .

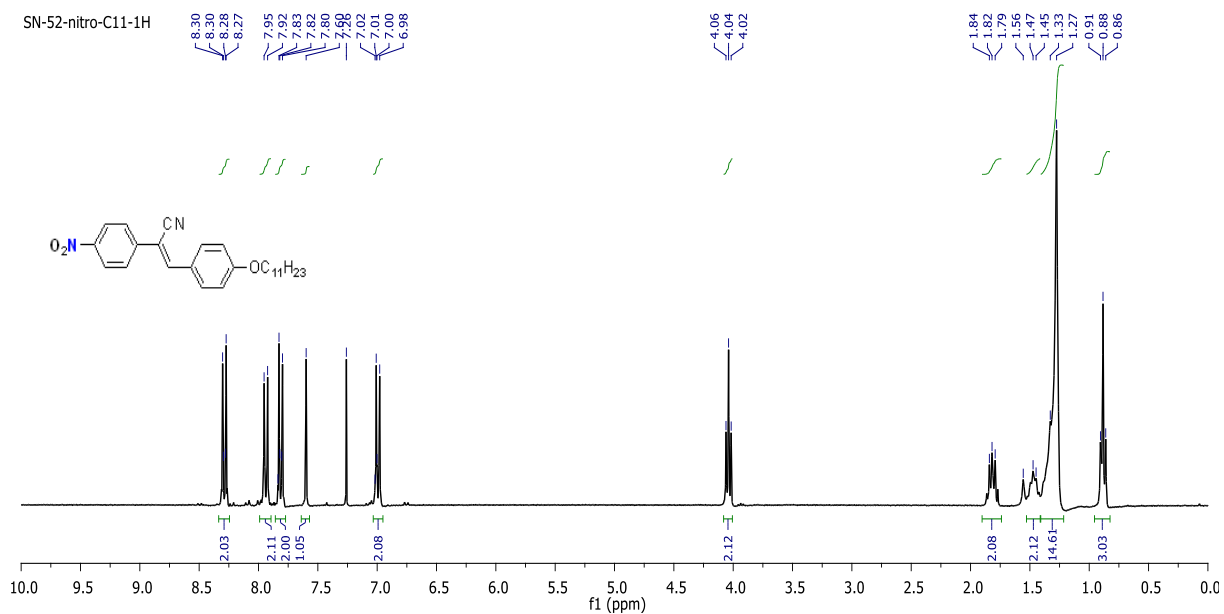

Figure S9:  $^1\text{H}$  NMR (300 MHz) spectrum of  $\text{NO}_2\text{-C}_{11}$  in  $\text{CDCl}_3$ .



SN-52-nitro-C11-13C

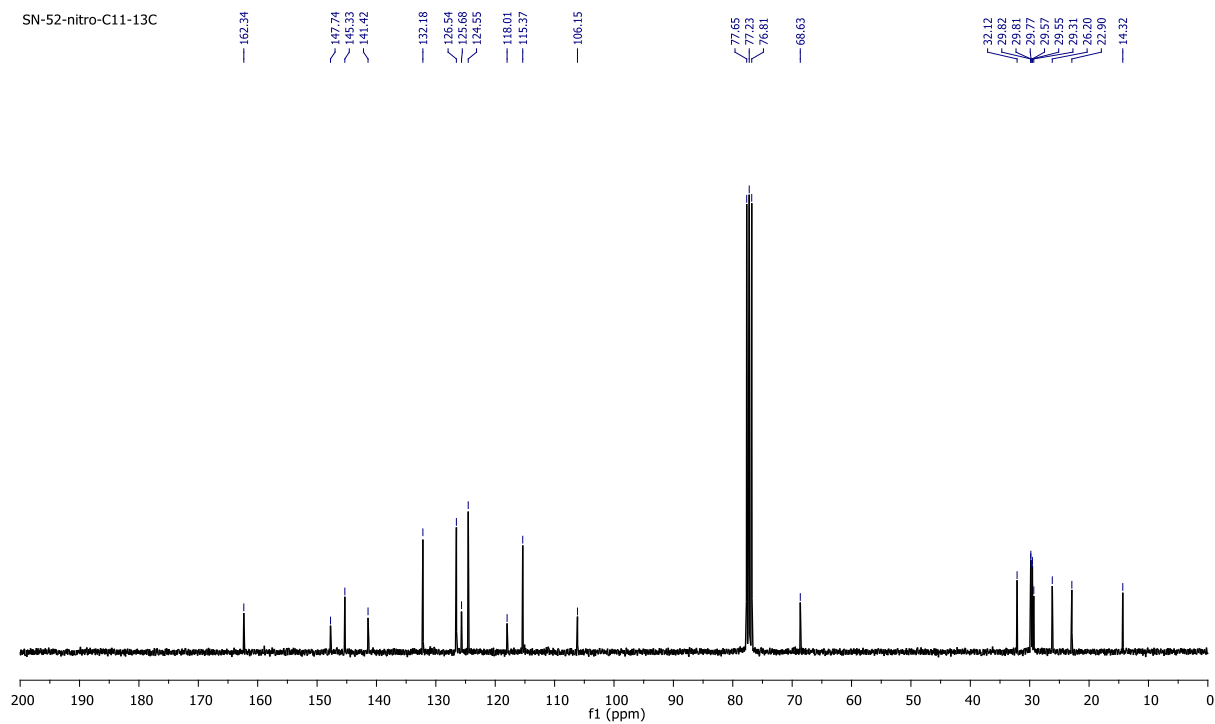

Figure S10:  $^{13}\text{C}$  NMR (75 MHz) spectrum of  $\text{NO}_2\text{-C}_{11}$  in  $\text{CDCl}_3$ .

## POM images:

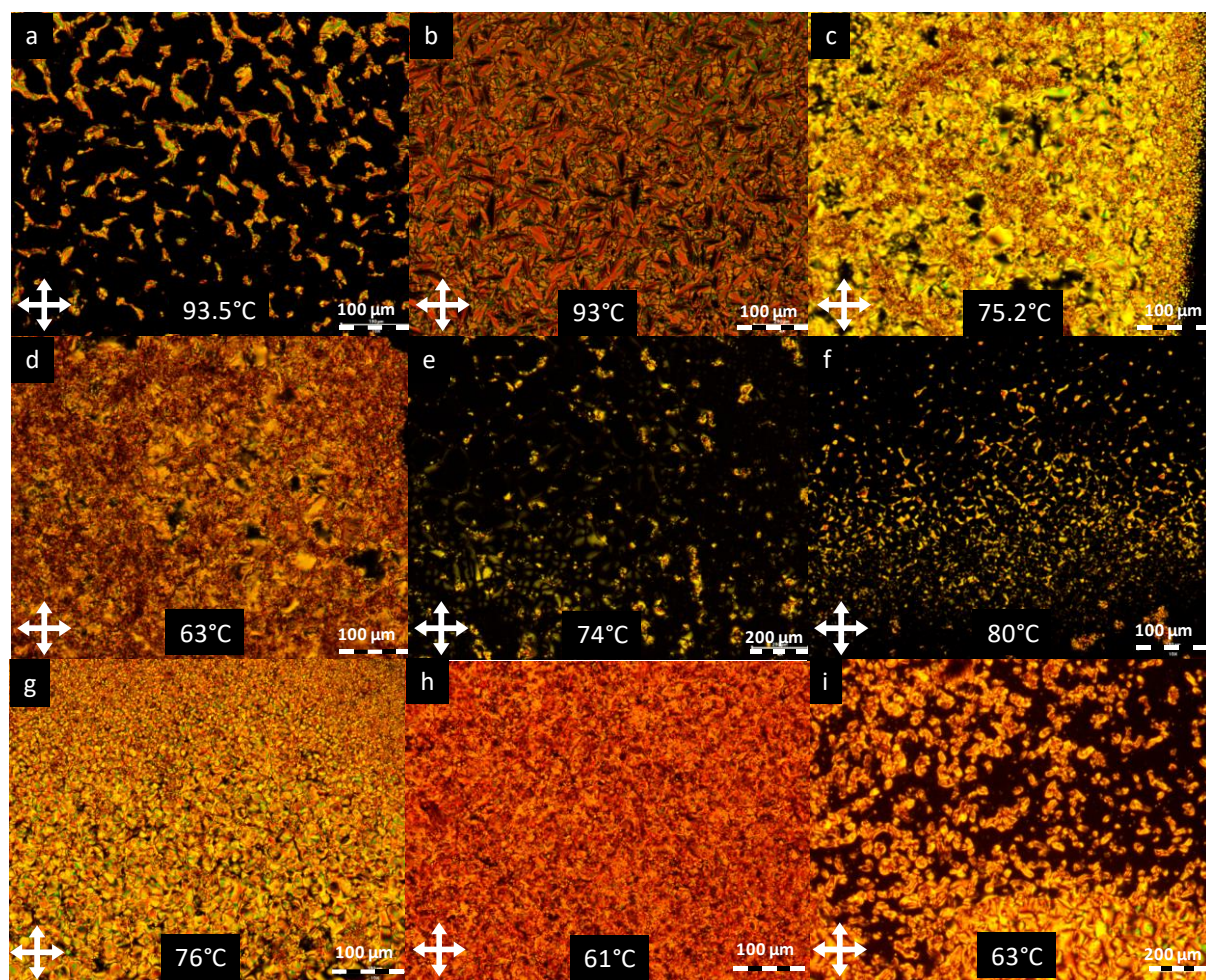

**Figure S11:** POM images of (a, b)  $\text{NO}_2\text{-C}_{11}$  (in heating and cooling, respectively); (c)  $\text{NO}_2\text{-C}_8\cdots\text{F}_4\text{St}$  (cooling); (d)  $\text{NO}_2\text{-C}_9\cdots\text{F}_4\text{St}$  (cooling); (e)  $\text{NO}_2\text{-C}_{10}\cdots\text{F}_4\text{St}$  (cooling); (f, g)  $\text{NO}_2\text{-C}_{11}\cdots\text{F}_4\text{St}$  (in heating and cooling, respectively); (h)  $\text{NO}_2\text{-C}_9\cdots\text{F}_4\text{Az}$  (cooling) and (i)  $\text{NO}_2\text{-C}_{11}\cdots\text{F}_4\text{Az}$  (cooling); at the different mentioned temperatures.

## DSC thermograms:

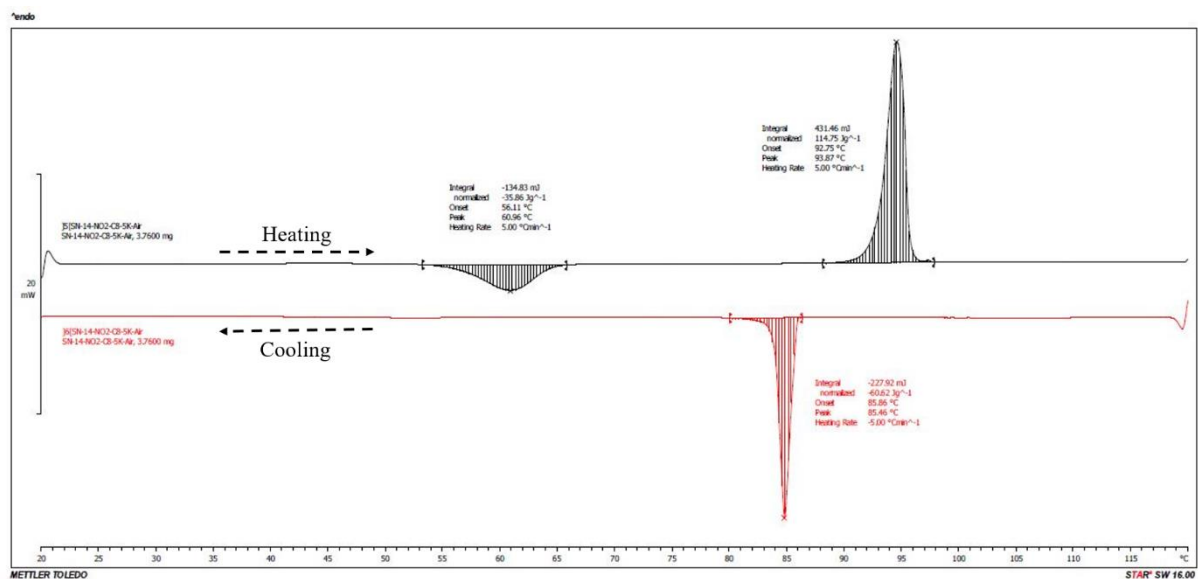

Figure S12: DSC traces obtained from the 2<sup>nd</sup> heating and 2<sup>nd</sup> cooling cycle at a rate of 5 °C min<sup>-1</sup> for compound NO<sub>2</sub>-C<sub>8</sub>.

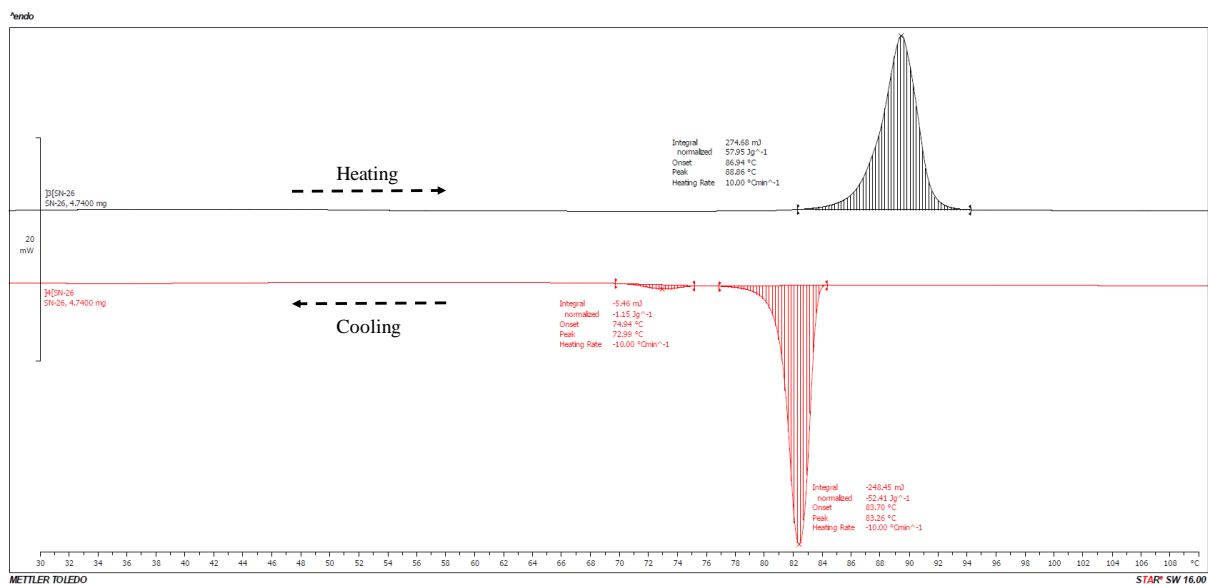

Figure S13: DSC traces obtained from the 2<sup>nd</sup> heating and 2<sup>nd</sup> cooling cycle at a rate of 10 °C min<sup>-1</sup> for compound NO<sub>2</sub>-C<sub>9</sub>.

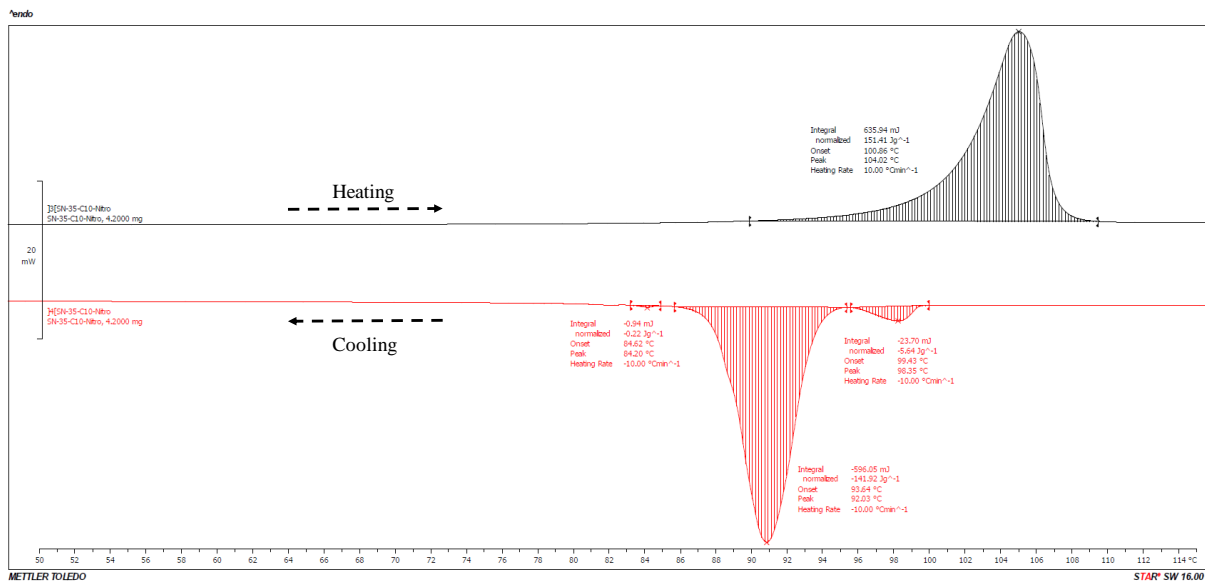

Figure S14: DSC traces obtained from the 2<sup>nd</sup> heating and 2<sup>nd</sup> cooling cycle at a rate of 10 °C min<sup>-1</sup> for compound NO<sub>2</sub>-C<sub>10</sub>.

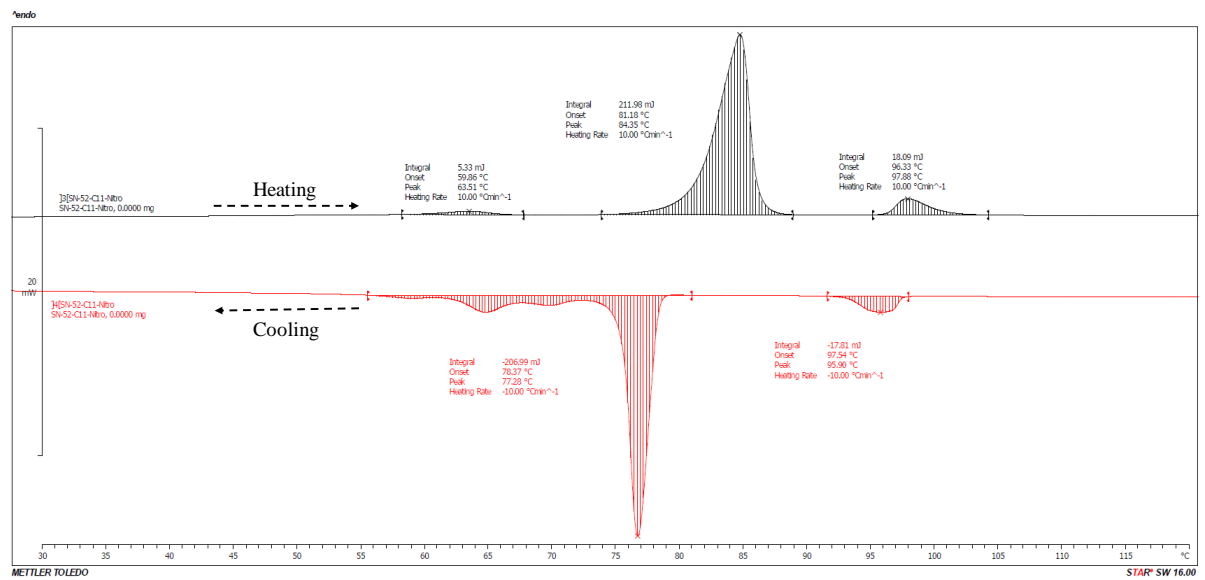

Figure S15: DSC traces obtained from the 2<sup>nd</sup> heating and 2<sup>nd</sup> cooling cycle at a rate of 10 °C min<sup>-1</sup> for compound NO<sub>2</sub>-C<sub>11</sub>.

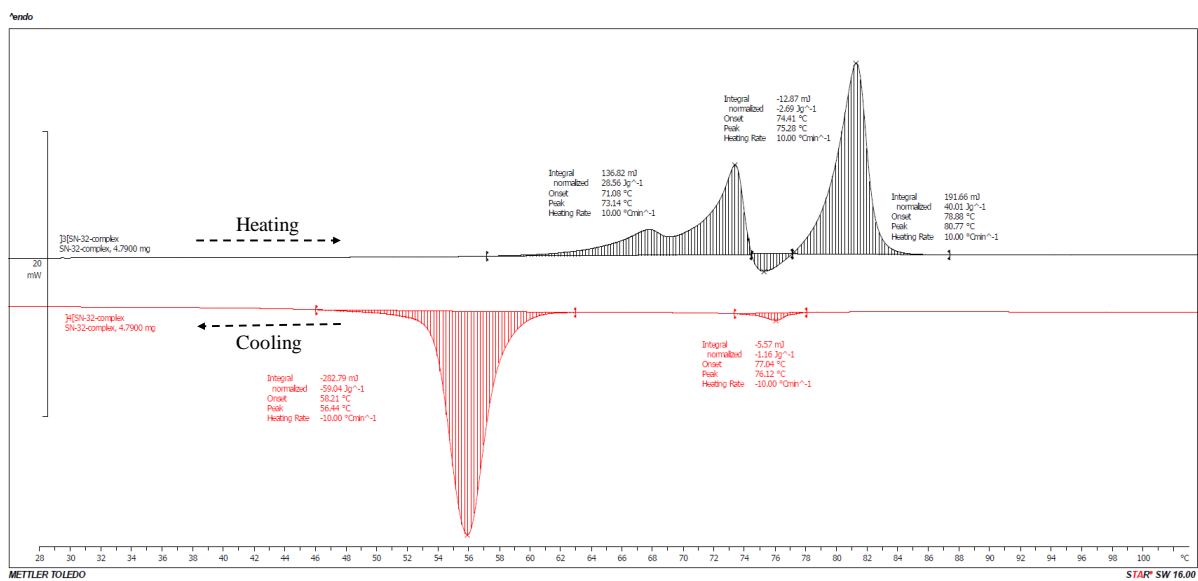

Figure S16: DSC traces obtained from the 2<sup>nd</sup> heating and 2<sup>nd</sup> cooling cycle at a rate of 10 °C min<sup>-1</sup> for compound NO<sub>2</sub>-C<sub>8</sub>...F<sub>4</sub>St.

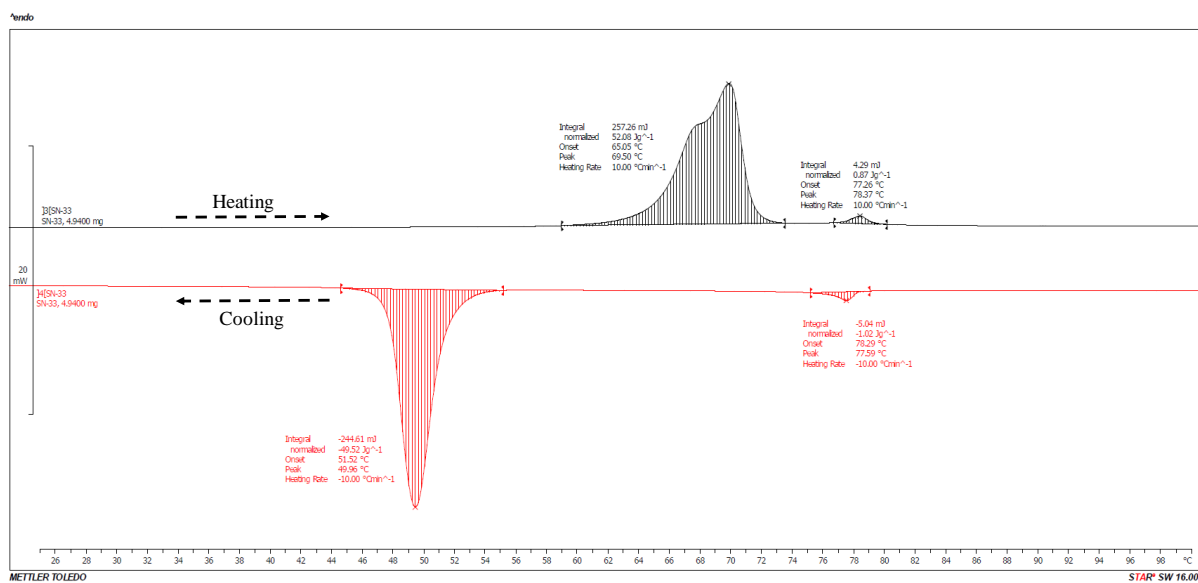

Figure S17: DSC traces obtained from the 2<sup>nd</sup> heating and 2<sup>nd</sup> cooling cycle at a rate of 10 °C min<sup>-1</sup> for compound NO<sub>2</sub>-C<sub>9</sub>...F<sub>4</sub>St.

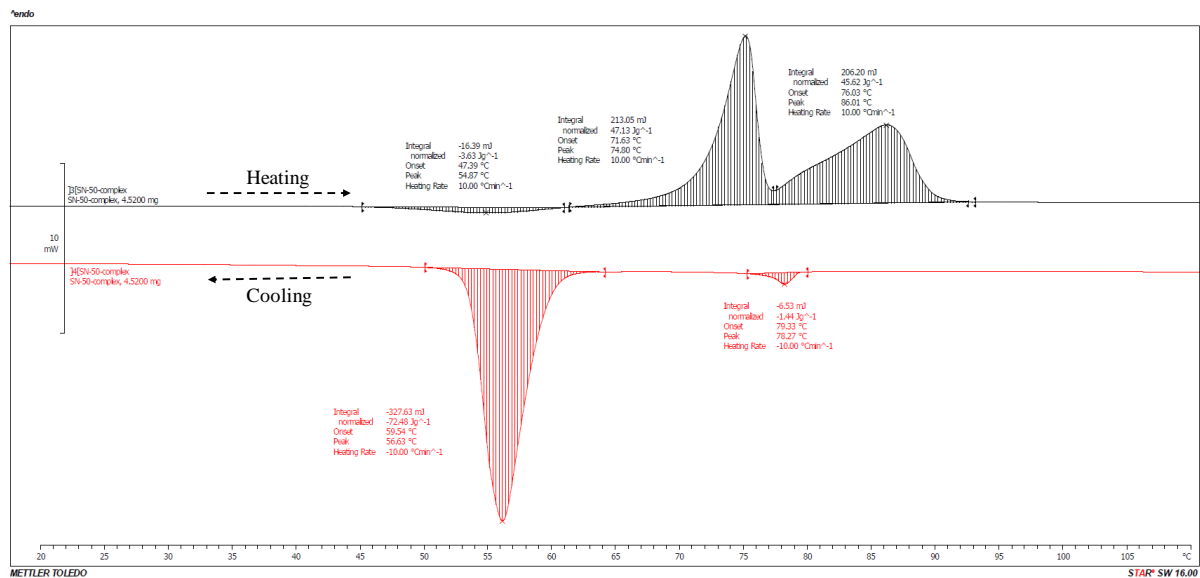

Figure S18: DSC traces obtained from the 2<sup>nd</sup> heating and 2<sup>nd</sup> cooling cycle at a rate of 10 °C min<sup>-1</sup> for compound NO<sub>2</sub>-C<sub>10</sub>-F<sub>4</sub>St.

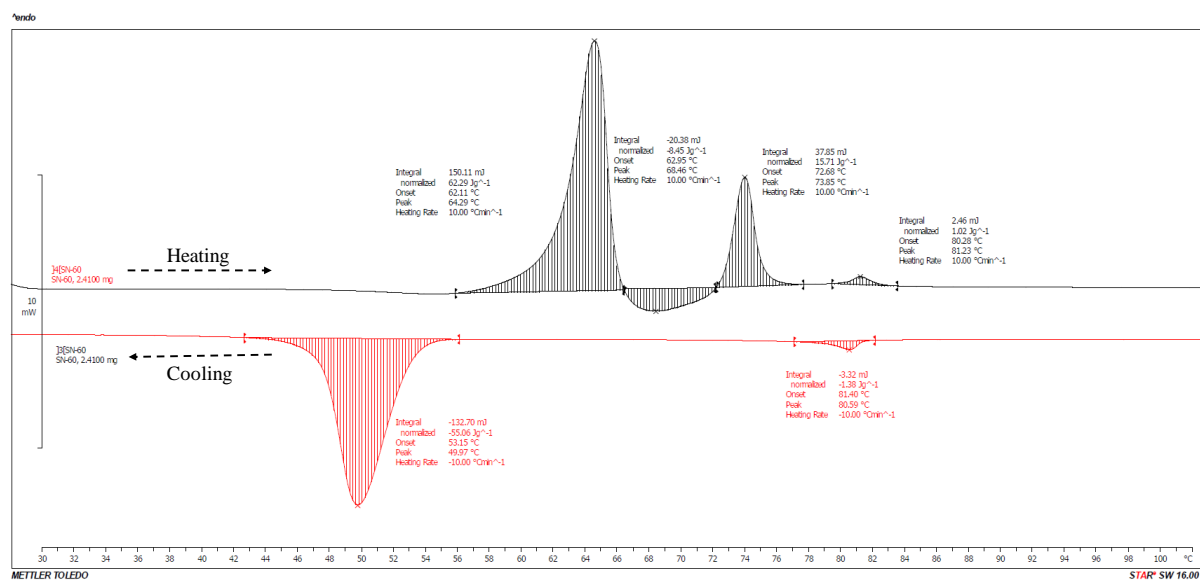

Figure S19: DSC traces obtained from the 2<sup>nd</sup> heating and 2<sup>nd</sup> cooling cycle at a rate of 10 °C min<sup>-1</sup> for compound NO<sub>2</sub>-C<sub>11</sub>-F<sub>4</sub>St.

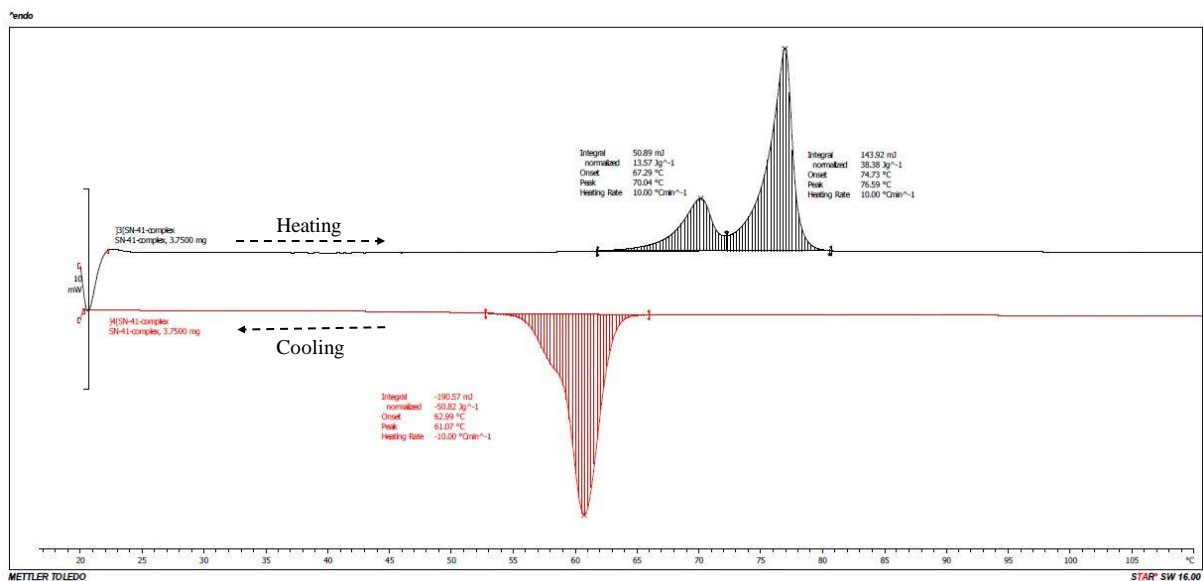

**Figure S20:** DSC traces obtained from the 2<sup>nd</sup> heating and 2<sup>nd</sup> cooling cycle at a rate of 10 °C min<sup>-1</sup> for compound NO<sub>2</sub>-C<sub>8</sub>...F<sub>4</sub>Az.

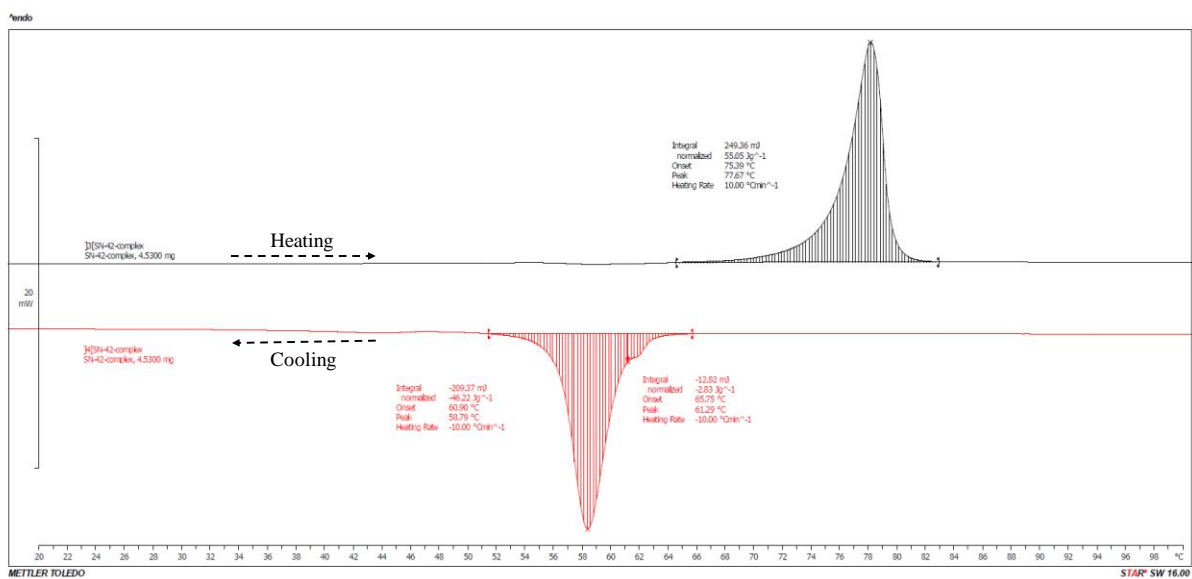

**Figure S21:** DSC traces obtained from the 2<sup>nd</sup> heating and 2<sup>nd</sup> cooling cycle at a rate of 10 °C min<sup>-1</sup> for compound NO<sub>2</sub>-C<sub>9</sub>...F<sub>4</sub>Az.

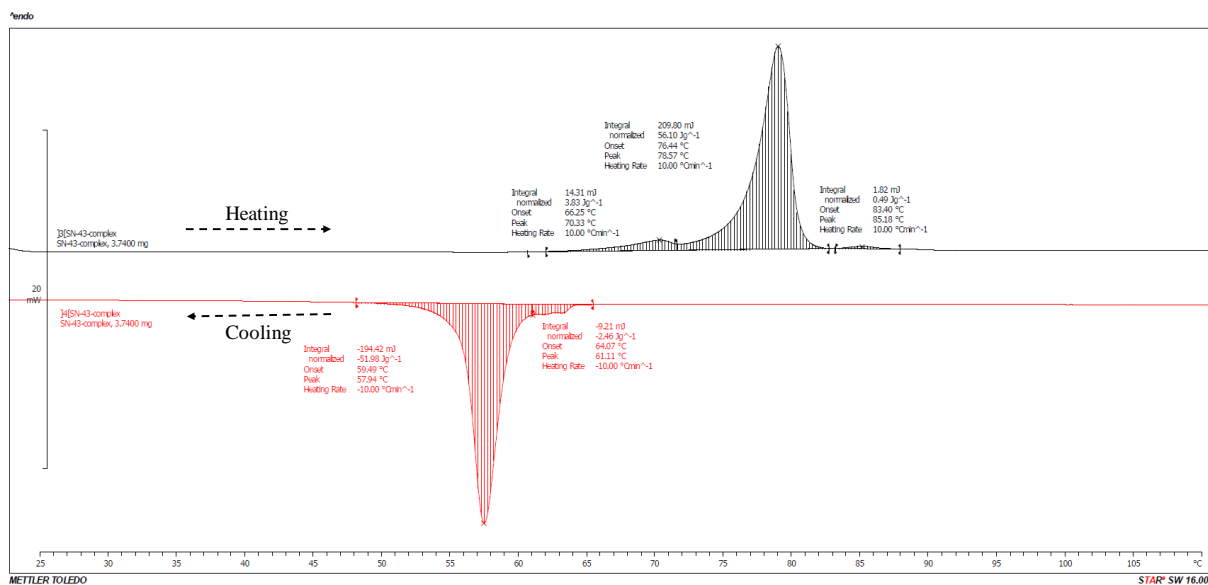

**Figure S22:** DSC traces obtained from the 2<sup>nd</sup> heating and 2<sup>nd</sup> cooling cycle at a rate of 10 °C min<sup>-1</sup> for compound **NO<sub>2</sub>-C<sub>10</sub>...F<sub>4</sub>Az**.

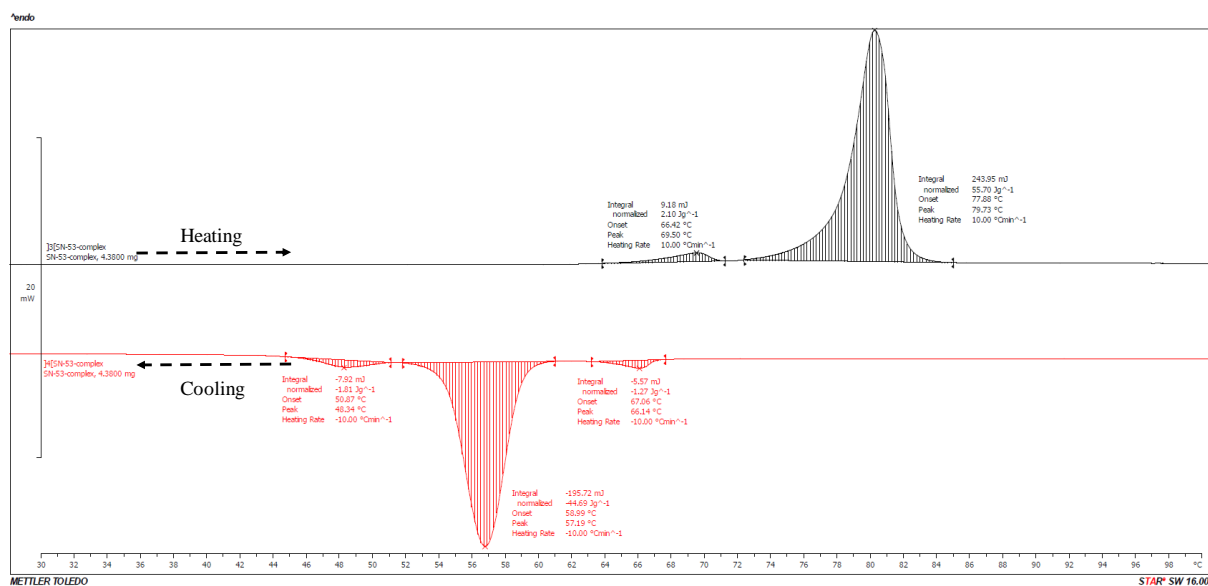

**Figure S23:** DSC traces obtained from the 2<sup>nd</sup> heating and 2<sup>nd</sup> cooling cycle at a rate of 10 °C min<sup>-1</sup> for compound **NO<sub>2</sub>-C<sub>11</sub>...F<sub>4</sub>Az**.



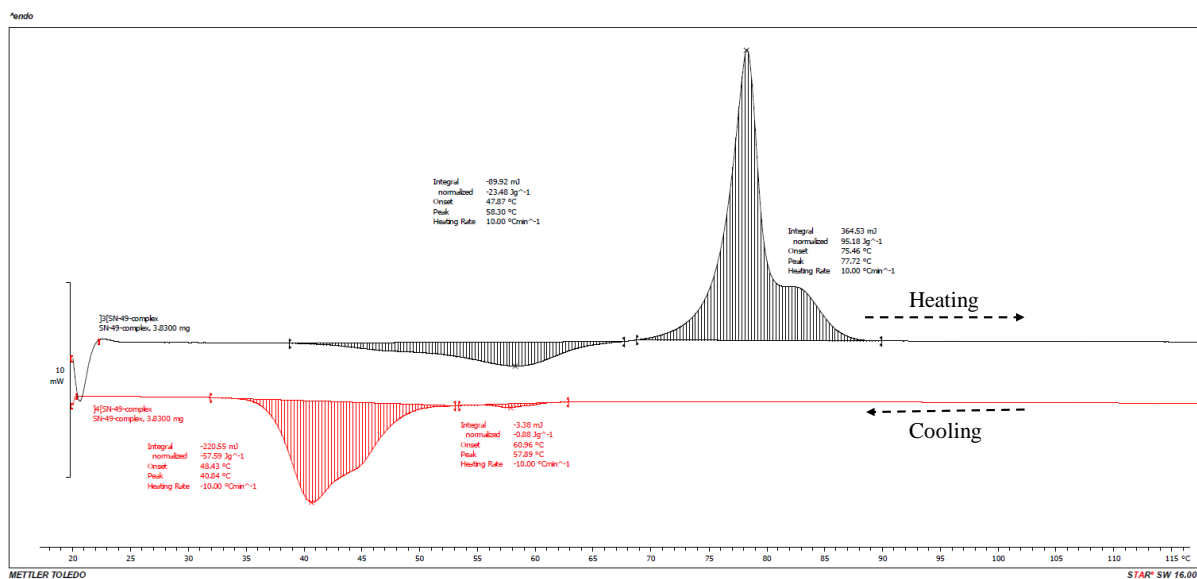

Figure S24: DSC traces obtained from the 2<sup>nd</sup> heating and 2<sup>nd</sup> cooling cycle at a rate of 10 °C min<sup>-1</sup> for compound NO<sub>2</sub>-C<sub>10</sub>-F<sub>3</sub>Az.

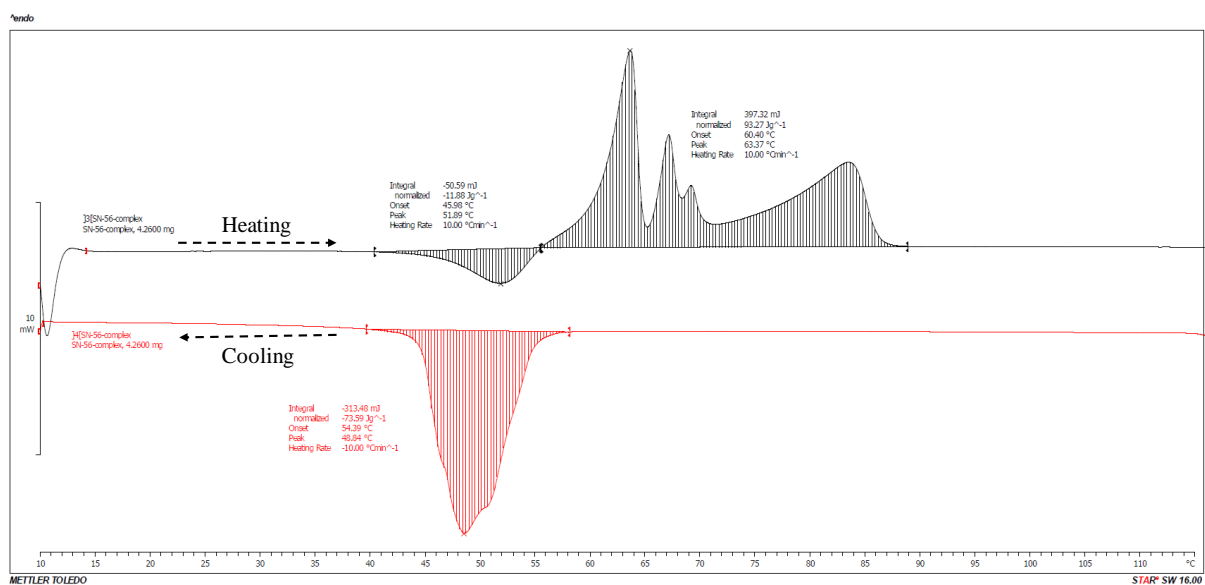

Figure S25: DSC traces obtained from the 2<sup>nd</sup> heating and 2<sup>nd</sup> cooling cycle at a rate of 10 °C min<sup>-1</sup> for compound NO<sub>2</sub>-C<sub>10</sub>-F<sub>2</sub>Az.

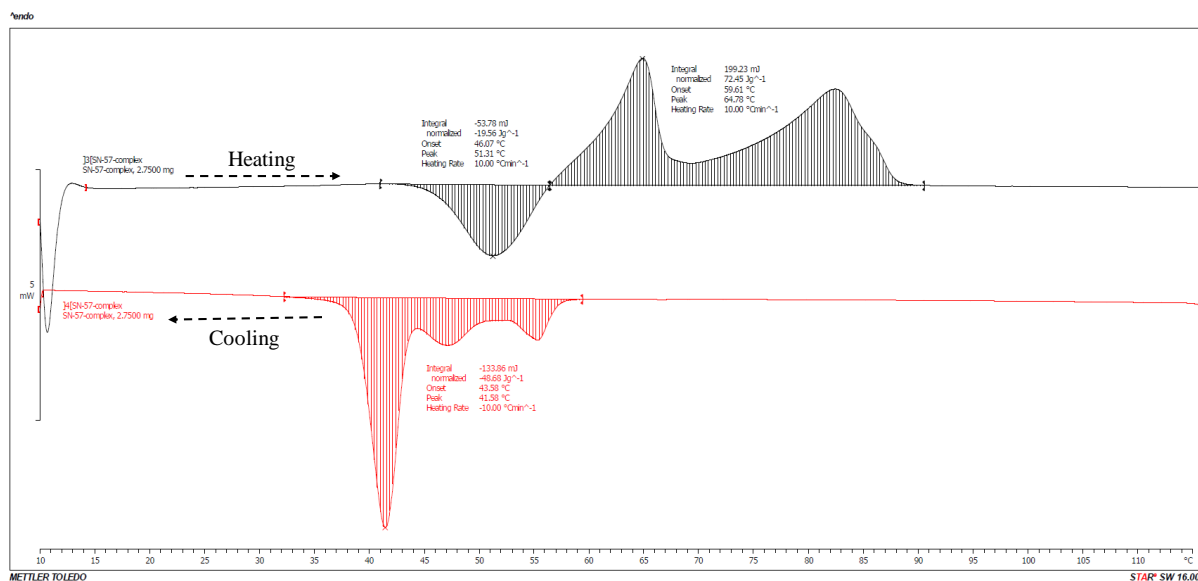

**Figure S26:** DSC traces obtained from the 2<sup>nd</sup> heating and 2<sup>nd</sup> cooling cycle at a rate of 10 °C min<sup>-1</sup> for compound NO<sub>2</sub>-C<sub>10</sub>...F<sub>2</sub>'Az.

## Computational studies:

### Theoretical specifications:

Structures of all complexes were optimised with the Gaussian 09 packages. The interaction energies were obtained as the energy differences counterpoise correction on the mp2/LanL2DZ. The basis set super position error (BSSE) has been undertaken for achieving errorless data of the supramolecule<sup>[S4,S5]</sup>.

Imaginary modes were minimised using the screwing method. In this method, the optimised geometry is resubmitted upon manual displacement of the second frequency. During the second job submission, the command **Opt = tight** was used.

**Theoretical specifications:** p opt freq mp2/LanL2DZ counterpoise = 2

**Table S1:** Calculated interaction energies of the different complexes.

| Complex                                                | $E_{AB}$ (BSSE corrected)<br>(Hartree) | $(E_A+E_B)$ BSSE Corrected<br>(Hartree) | $E_{int.}$ (BSSE corrected)<br>(Hartree) | $E_{int.}$ (BSSE corrected)<br>(kJ/Mol) |
|--------------------------------------------------------|----------------------------------------|-----------------------------------------|------------------------------------------|-----------------------------------------|
| NO <sub>2</sub> -C <sub>10</sub> ...F <sub>4</sub> St  | -2006.44759                            | -2006.446575                            | -0.007692308                             | -20.19                                  |
| NO <sub>2</sub> -C <sub>10</sub> ...F <sub>4</sub> Az  | -2038.42375                            | -2038.421206                            | -0.006620833                             | -17.38                                  |
| NO <sub>2</sub> -C <sub>10</sub> ...F <sub>3</sub> Az  | -1939.4923                             | -1939.4893                              | -0.006201607                             | -16.28                                  |
| NO <sub>2</sub> -C <sub>10</sub> ...F <sub>2</sub> Az  | -1840.77384                            | -1840.766828                            | -0.00466                                 | -12.23                                  |
| NO <sub>2</sub> -C <sub>10</sub> ...F <sub>2</sub> 'Az | -1840.75995                            | -1840.753543                            | -0.004406667                             | -11.57                                  |

### Coordinates for the optimised geometry of NO<sub>2</sub>-C<sub>1</sub>...F<sub>4</sub>St

Charge = 0; multiplicity = 1 in supermolecule

Charge = 0; multiplicity = 1 in fragment 1.

Charge = 0; multiplicity = 1 in fragment 2.

|               |          |          |          |
|---------------|----------|----------|----------|
| C(Fragment=1) | -3.19669 | 2.82106  | -0.01305 |
| C(Fragment=1) | -2.01506 | 3.05855  | -0.74136 |
| C(Fragment=1) | -2.07746 | 3.71164  | -1.9783  |
| C(Fragment=1) | -3.27913 | 4.27811  | -2.39692 |
| C(Fragment=1) | -4.44271 | 4.09723  | -1.65057 |
| C(Fragment=1) | -4.43183 | 3.31767  | -0.4797  |
| C(Fragment=1) | -5.73348 | 4.8551   | -2.10671 |
| C(Fragment=1) | -6.97153 | 4.30557  | -2.07845 |
| C(Fragment=1) | -7.20384 | 2.78492  | -2.00605 |
| C(Fragment=1) | -8.51771 | 2.29513  | -2.00811 |
| C(Fragment=1) | -8.77283 | 0.96244  | -1.99046 |
| C(Fragment=1) | -7.72319 | 0.03958  | -1.99219 |
| C(Fragment=1) | -6.39266 | 0.49332  | -1.95863 |
| C(Fragment=1) | -6.12726 | 1.87575  | -1.96418 |
| O(Fragment=1) | -8.01634 | -1.36333 | -1.99212 |
| C(Fragment=1) | -7.04931 | -2.07107 | -2.76881 |
| N(Fragment=1) | -0.70201 | 2.6152   | -0.2268  |
| O(Fragment=1) | 0.09121  | 2.24427  | -1.28062 |
| O(Fragment=1) | -0.86202 | 1.52863  | 0.59341  |
| C(Fragment=1) | -5.59433 | 6.17493  | -2.56603 |
| N(Fragment=1) | -5.48096 | 7.25055  | -2.94036 |
| H(Fragment=1) | -3.16005 | 2.26053  | 0.89747  |
| H(Fragment=1) | -1.20741 | 3.76955  | -2.59102 |
| H(Fragment=1) | -3.30912 | 4.83921  | -3.31117 |
| H(Fragment=1) | -5.3301  | 3.11964  | 0.04324  |
| H(Fragment=1) | -7.82429 | 4.95178  | -2.14103 |
| H(Fragment=1) | -9.33952 | 2.98562  | -2.03564 |

|               |          |          |          |
|---------------|----------|----------|----------|
| H(Fragment=1) | -9.78573 | 0.61186  | -2.00139 |
| H(Fragment=1) | -5.58454 | -0.20747 | -1.95066 |
| H(Fragment=1) | -5.12654 | 2.23119  | -1.95047 |
| H(Fragment=1) | -7.27933 | -3.11507 | -2.75878 |
| H(Fragment=1) | -7.07286 | -1.71207 | -3.77689 |
| H(Fragment=1) | -6.07585 | -1.91522 | -2.35891 |
| C(Fragment=2) | 3.80177  | -1.27299 | -0.15156 |
| C(Fragment=2) | 4.8818   | -2.01535 | -0.55633 |
| C(Fragment=2) | 6.2027   | -1.67651 | -0.24661 |
| C(Fragment=2) | 6.4315   | -0.69378 | 0.70576  |
| C(Fragment=2) | 5.34386  | 0.0864   | 1.11574  |
| C(Fragment=2) | 4.03758  | -0.1759  | 0.64339  |
| I(Fragment=2) | 2.42311  | 1.12594  | 0.99253  |
| C(Fragment=2) | 7.01357  | -2.59036 | -1.19547 |
| C(Fragment=2) | 8.25538  | -2.93373 | -1.6438  |
| C(Fragment=2) | 9.71183  | -3.40721 | -1.37683 |
| C(Fragment=2) | 10.33985 | -4.22114 | -0.46279 |
| C(Fragment=2) | 10.41594 | -2.89012 | -2.4531  |
| C(Fragment=2) | 11.45244 | -4.9086  | -0.95121 |
| H(Fragment=2) | 9.98568  | -4.34845 | 0.53436  |
| C(Fragment=2) | 11.51918 | -3.51942 | -2.93473 |
| H(Fragment=2) | 10.06049 | -1.97599 | -2.93365 |
| C(Fragment=2) | 11.96645 | -4.61389 | -2.25208 |
| H(Fragment=2) | 11.9095  | -5.67928 | -0.38287 |
| H(Fragment=2) | 11.98588 | -3.17872 | -3.84044 |
| O(Fragment=2) | 12.95868 | -5.44201 | -2.87316 |
| C(Fragment=2) | 14.23006 | -4.97903 | -2.48865 |
| H(Fragment=2) | 14.31843 | -5.06351 | -1.42861 |
| H(Fragment=2) | 14.9875  | -5.56136 | -2.96254 |
| H(Fragment=2) | 14.33937 | -3.95245 | -2.77583 |
| H(Fragment=2) | 6.30267  | -3.16599 | -1.74952 |
| H(Fragment=2) | 8.19552  | -2.81419 | -2.66155 |

|               |         |          |          |
|---------------|---------|----------|----------|
| F(Fragment=2) | 7.64597 | -0.50435 | 1.26157  |
| F(Fragment=2) | 4.68567 | -3.12395 | -1.29369 |
| F(Fragment=2) | 5.53278 | 1.17116  | 1.88955  |
| F(Fragment=2) | 2.57787 | -1.60138 | -0.59213 |

### Coordinates for the optimised geometry of NO<sub>2</sub>-C<sub>1</sub>...F<sub>4</sub>Az

Charge = 0; multiplicity = 1 in supermolecule

Charge = 0; multiplicity = 1 in fragment 1.

Charge = 0; multiplicity = 1 in fragment 2.

|               |          |          |          |
|---------------|----------|----------|----------|
| C(Fragment=1) | -0.55763 | 1.44208  | -0.00476 |
| C(Fragment=1) | 0.624    | 1.67957  | -0.73307 |
| C(Fragment=1) | 0.5616   | 2.33266  | -1.97001 |
| C(Fragment=1) | -0.64007 | 2.89913  | -2.38863 |
| C(Fragment=1) | -1.80365 | 2.71825  | -1.64228 |
| C(Fragment=1) | -1.79277 | 1.93869  | -0.47141 |
| C(Fragment=1) | -3.09442 | 3.47612  | -2.09842 |
| C(Fragment=1) | -4.33247 | 2.92659  | -2.07016 |
| C(Fragment=1) | -4.56478 | 1.40594  | -1.99776 |
| C(Fragment=1) | -5.87865 | 0.91615  | -1.99982 |
| C(Fragment=1) | -6.13377 | -0.41654 | -1.98217 |
| C(Fragment=1) | -5.08413 | -1.3394  | -1.9839  |
| C(Fragment=1) | -3.7536  | -0.88566 | -1.95034 |
| C(Fragment=1) | -3.4882  | 0.49677  | -1.95589 |
| O(Fragment=1) | -5.37728 | -2.74231 | -1.98383 |
| C(Fragment=1) | -4.41025 | -3.45006 | -2.76052 |
| N(Fragment=1) | 1.93705  | 1.23622  | -0.21851 |
| O(Fragment=1) | 2.73027  | 0.86528  | -1.27233 |
| O(Fragment=1) | 1.77704  | 0.14965  | 0.6017   |
| C(Fragment=1) | -2.95527 | 4.79595  | -2.55774 |
| N(Fragment=1) | -2.8419  | 5.87157  | -2.93207 |
| H(Fragment=1) | -0.52099 | 0.88155  | 0.90576  |

|               |          |          |          |
|---------------|----------|----------|----------|
| H(Fragment=1) | 1.43165  | 2.39057  | -2.58273 |
| H(Fragment=1) | -0.67006 | 3.46023  | -3.30288 |
| H(Fragment=1) | -2.69104 | 1.74066  | 0.05153  |
| H(Fragment=1) | -5.18523 | 3.5728   | -2.13274 |
| H(Fragment=1) | -6.70046 | 1.60664  | -2.02735 |
| H(Fragment=1) | -7.14667 | -0.76712 | -1.9931  |
| H(Fragment=1) | -2.94548 | -1.58646 | -1.94237 |
| H(Fragment=1) | -2.48748 | 0.85221  | -1.94218 |
| H(Fragment=1) | -4.64027 | -4.49406 | -2.75049 |
| H(Fragment=1) | -4.4338  | -3.09105 | -3.7686  |
| H(Fragment=1) | -3.43679 | -3.2942  | -2.35062 |
| C(Fragment=2) | 6.43959  | -2.65586 | -0.13375 |
| C(Fragment=2) | 7.51962  | -3.39822 | -0.53852 |
| C(Fragment=2) | 8.84052  | -3.05938 | -0.2288  |
| C(Fragment=2) | 9.06932  | -2.07665 | 0.72357  |
| C(Fragment=2) | 7.98168  | -1.29647 | 1.13355  |
| C(Fragment=2) | 6.6754   | -1.55877 | 0.66119  |
| I(Fragment=2) | 5.06093  | -0.25693 | 1.01034  |
| C(Fragment=2) | 12.34965 | -4.79008 | -1.35902 |
| C(Fragment=2) | 12.97766 | -5.60401 | -0.44499 |
| C(Fragment=2) | 13.05376 | -4.273   | -2.43529 |
| C(Fragment=2) | 14.09026 | -6.29148 | -0.9334  |
| H(Fragment=2) | 12.62349 | -5.73133 | 0.55217  |
| C(Fragment=2) | 14.15699 | -4.90229 | -2.91692 |
| H(Fragment=2) | 12.69831 | -3.35886 | -2.91585 |
| C(Fragment=2) | 14.60426 | -5.99677 | -2.23427 |
| H(Fragment=2) | 14.54732 | -7.06216 | -0.36507 |
| H(Fragment=2) | 14.6237  | -4.56159 | -3.82263 |
| O(Fragment=2) | 15.5965  | -6.82488 | -2.85535 |
| C(Fragment=2) | 16.86788 | -6.3619  | -2.47084 |
| H(Fragment=2) | 16.95625 | -6.44638 | -1.4108  |
| H(Fragment=2) | 17.62532 | -6.94423 | -2.94473 |

|               |          |          |          |
|---------------|----------|----------|----------|
| H(Fragment=2) | 16.97718 | -5.33532 | -2.75802 |
| F(Fragment=2) | 10.28379 | -1.88723 | 1.27938  |
| F(Fragment=2) | 7.32348  | -4.50683 | -1.27588 |
| F(Fragment=2) | 8.1706   | -0.21171 | 1.90736  |
| F(Fragment=2) | 5.21568  | -2.98425 | -0.57433 |
| N(Fragment=2) | 9.65139  | -3.97324 | -1.17766 |
| N(Fragment=2) | 10.8932  | -4.3166  | -1.626   |

### Coordinates for the optimised geometry of NO<sub>2</sub>-C<sub>1</sub>...F<sub>3</sub>Az

**Charge = 0 multiplicity = 1 in supermolecule**

**Charge = 0 multiplicity = 1 in Fragment 1.**

**Charge = 0 multiplicity = 1 in Fragment 2.**

|               |          |          |          |
|---------------|----------|----------|----------|
| C(Fragment=1) | -0.47762 | 1.29386  | 0.05353  |
| C(Fragment=1) | 0.72865  | 1.58812  | -0.60634 |
| C(Fragment=1) | 0.71321  | 2.36876  | -1.7666  |
| C(Fragment=1) | -0.48265 | 2.93974  | -2.20776 |
| C(Fragment=1) | -1.6793  | 2.68248  | -1.53428 |
| C(Fragment=1) | -1.6931  | 1.80718  | -0.43603 |
| C(Fragment=1) | -2.9679  | 3.39913  | -2.01294 |
| C(Fragment=1) | -4.20606 | 2.86072  | -1.93157 |
| C(Fragment=1) | -4.44405 | 1.33822  | -1.83403 |
| C(Fragment=1) | -5.7624  | 0.85619  | -1.80578 |
| C(Fragment=1) | -6.01166 | -0.47797 | -1.81027 |
| C(Fragment=1) | -4.95852 | -1.39989 | -1.81054 |
| C(Fragment=1) | -3.63019 | -0.9437  | -1.79676 |
| C(Fragment=1) | -3.37183 | 0.43632  | -1.78831 |
| O(Fragment=1) | -5.2504  | -2.80279 | -1.84075 |
| C(Fragment=1) | -4.26817 | -3.50156 | -2.61144 |
| N(Fragment=1) | 2.00737  | 1.08412  | -0.08205 |
| O(Fragment=1) | 2.84908  | 0.82784  | -1.12056 |

|               |          |          |          |
|---------------|----------|----------|----------|
| O(Fragment=1) | 1.79803  | -0.05694 | 0.62444  |
| C(Fragment=1) | -2.81747 | 4.68054  | -2.55719 |
| N(Fragment=1) | -2.69442 | 5.72909  | -3.00254 |
| H(Fragment=1) | -0.46633 | 0.68321  | 0.93219  |
| H(Fragment=1) | 1.61914  | 2.53372  | -2.31355 |
| H(Fragment=1) | -0.48505 | 3.57222  | -3.07142 |
| H(Fragment=1) | -2.61554 | 1.54716  | 0.04036  |
| H(Fragment=1) | -5.05941 | 3.51275  | -1.97943 |
| H(Fragment=1) | -6.57816 | 1.54711  | -1.80416 |
| H(Fragment=1) | -7.02366 | -0.8278  | -1.80332 |
| H(Fragment=1) | -2.82214 | -1.64421 | -1.78118 |
| H(Fragment=1) | -2.36343 | 0.79539  | -1.76904 |
| H(Fragment=1) | -4.49525 | -4.54789 | -2.61292 |
| H(Fragment=1) | -4.2768  | -3.13435 | -3.61704 |
| H(Fragment=1) | -3.30081 | -3.34708 | -2.1836  |
| C(Fragment=2) | 6.31469  | -2.71096 | -0.18594 |
| C(Fragment=2) | 7.36024  | -3.46518 | -0.7745  |
| C(Fragment=2) | 8.68048  | -2.99534 | -0.67015 |
| C(Fragment=2) | 8.94284  | -1.93932 | 0.22155  |
| C(Fragment=2) | 7.89787  | -1.27981 | 0.85826  |
| C(Fragment=2) | 6.58225  | -1.59835 | 0.56662  |
| I(Fragment=2) | 5.02142  | -0.37204 | 1.25321  |
| C(Fragment=2) | 11.96547 | -4.89113 | -1.67692 |
| C(Fragment=2) | 12.62212 | -5.72401 | -0.80925 |
| C(Fragment=2) | 12.70901 | -4.31639 | -2.71691 |
| C(Fragment=2) | 13.90558 | -6.21466 | -1.12412 |
| H(Fragment=2) | 12.18255 | -6.0033  | 0.11621  |
| C(Fragment=2) | 13.96383 | -4.83149 | -3.04631 |
| H(Fragment=2) | 12.32902 | -3.50498 | -3.29893 |
| C(Fragment=2) | 14.47805 | -5.88109 | -2.3501  |
| H(Fragment=2) | 14.44239 | -6.83859 | -0.42802 |
| H(Fragment=2) | 14.52674 | -4.42003 | -3.86057 |



|               |          |          |          |
|---------------|----------|----------|----------|
| O(Fragment=2) | 15.57985 | -6.64841 | -2.87158 |
| C(Fragment=2) | 16.87187 | -6.19661 | -2.51409 |
| H(Fragment=2) | 16.98814 | -6.24333 | -1.45394 |
| H(Fragment=2) | 17.60308 | -6.82664 | -2.98201 |
| H(Fragment=2) | 16.99988 | -5.19198 | -2.84735 |
| F(Fragment=2) | 7.03781  | -4.60557 | -1.42189 |
| F(Fragment=2) | 8.16966  | -0.31306 | 1.78002  |
| F(Fragment=2) | 5.02029  | -3.06843 | -0.358   |
| H(Fragment=2) | 9.93189  | -1.66463 | 0.44991  |
| N(Fragment=2) | 9.96477  | -3.47125 | -1.44251 |
| N(Fragment=2) | 10.43156 | -4.64976 | -1.39947 |

**Coordinates for the optimised geometry of NO<sub>2</sub>-C<sub>1</sub>...F<sub>2</sub>Az**

**Charge = 0; multiplicity = 1 in supermolecule**

**Charge = 0; multiplicity = 1 in fragment 1.**

**Charge = 0; multiplicity = 1 in fragment 2.**

|               |           |          |          |
|---------------|-----------|----------|----------|
| C(Fragment=1) | -5.43684  | -0.38283 | -0.56551 |
| C(Fragment=1) | -4.44057  | -0.54611 | 0.41059  |
| C(Fragment=1) | -4.71437  | -1.33481 | 1.53081  |
| C(Fragment=1) | -5.98925  | -1.90028 | 1.72092  |
| C(Fragment=1) | -7.02785  | -1.59797 | 0.82963  |
| C(Fragment=1) | -6.74235  | -0.85612 | -0.33328 |
| C(Fragment=1) | -8.45553  | -2.15326 | 1.06168  |
| C(Fragment=1) | -9.52104  | -1.4605  | 0.61471  |
| C(Fragment=1) | -9.49163  | 0.08601  | 0.39172  |
| C(Fragment=1) | -10.44638 | 0.633    | -0.46382 |
| C(Fragment=1) | -10.45142 | 2.00056  | -0.77157 |
| C(Fragment=1) | -9.601    | 2.8957   | -0.11527 |
| C(Fragment=1) | -8.64134  | 2.38895  | 0.78521  |

|               |           |          |          |
|---------------|-----------|----------|----------|
| C(Fragment=1) | -8.56856  | 0.97556  | 1.02835  |
| O(Fragment=1) | -9.7245   | 4.29113  | -0.43483 |
| C(Fragment=1) | -8.64697  | 5.10323  | 0.02677  |
| N(Fragment=1) | -3.12655  | 0.03255  | 0.22356  |
| O(Fragment=1) | -2.21571  | -0.69932 | 0.87507  |
| O(Fragment=1) | -2.81477  | 0.04311  | -1.08089 |
| C(Fragment=1) | -8.61613  | -3.54433 | 1.7508   |
| N(Fragment=1) | -8.75091  | -4.71177 | 2.32913  |
| H(Fragment=1) | -5.21847  | 0.11367  | -1.48023 |
| H(Fragment=1) | -3.96197  | -1.50916 | 2.26349  |
| H(Fragment=1) | -6.17554  | -2.57651 | 2.56333  |
| H(Fragment=1) | -7.52111  | -0.68392 | -1.06164 |
| H(Fragment=1) | -10.43765 | -1.98509 | 0.41503  |
| H(Fragment=1) | -11.18792 | -0.00178 | -0.8874  |
| H(Fragment=1) | -11.13257 | 2.36952  | -1.51553 |
| H(Fragment=1) | -7.97508  | 3.05746  | 1.28927  |
| H(Fragment=1) | -7.82971  | 0.59788  | 1.71275  |
| H(Fragment=1) | -8.74995  | 6.09967  | -0.35003 |
| H(Fragment=1) | -8.66258  | 5.12873  | 1.08606  |
| H(Fragment=1) | -7.72235  | 4.70966  | -0.30013 |
| C(Fragment=2) | 3.35835   | 0.44447  | -0.17558 |
| C(Fragment=2) | 4.6878    | 0.43683  | 0.25178  |
| C(Fragment=2) | 5.55128   | -0.5693  | -0.13462 |
| C(Fragment=2) | 5.13495   | -1.51313 | -1.12197 |
| C(Fragment=2) | 3.76395   | -1.54026 | -1.50463 |
| C(Fragment=2) | 2.88379   | -0.56643 | -1.01988 |
| I(Fragment=2) | 0.85809   | -0.60028 | -1.54861 |
| C(Fragment=2) | 9.13417   | 0.5791   | 0.76236  |
| C(Fragment=2) | 9.80842   | 1.80448  | 0.49722  |
| C(Fragment=2) | 9.85812   | -0.58071 | 0.93904  |
| C(Fragment=2) | 11.20275  | 1.86218  | 0.74889  |
| H(Fragment=2) | 9.28003   | 2.67907  | 0.14937  |

|               |          |          |          |
|---------------|----------|----------|----------|
| C(Fragment=2) | 11.23375 | -0.53295 | 1.11519  |
| H(Fragment=2) | 9.33831  | -1.50948 | 0.94727  |
| C(Fragment=2) | 11.89651 | 0.69796  | 1.11841  |
| H(Fragment=2) | 11.73107 | 2.78579  | 0.66492  |
| H(Fragment=2) | 11.77507 | -1.43775 | 1.25222  |
| O(Fragment=2) | 13.26862 | 0.76214  | 1.50345  |
| C(Fragment=2) | 14.11241 | 0.63992  | 0.38679  |
| H(Fragment=2) | 13.90284 | 1.42521  | -0.29234 |
| H(Fragment=2) | 15.13715 | 0.69882  | 0.68437  |
| H(Fragment=2) | 13.94227 | -0.29523 | -0.08313 |
| F(Fragment=2) | 3.28929  | -2.50697 | -2.32626 |
| F(Fragment=2) | 2.5401   | 1.4386   | 0.22586  |
| H(Fragment=2) | 5.8229   | -2.22004 | -1.56911 |
| N(Fragment=2) | 6.84582  | -0.63144 | 0.55519  |
| N(Fragment=2) | 7.66436  | 0.45968  | 0.93155  |
| H(Fragment=2) | 5.0503   | 1.20267  | 0.88315  |

**Coordinates for the optimised geometry of complex NO<sub>2</sub>-C<sub>1</sub>...F<sub>2</sub>'Az**

**Charge = 0; multiplicity = 1 in supermolecule**

**Charge = 0; multiplicity = 1 in fragment 1.**

**Charge = 0; multiplicity = 1 in fragment 2.**

|               |          |          |          |
|---------------|----------|----------|----------|
| C(Fragment=1) | -5.46415 | -0.32047 | -0.52736 |
| C(Fragment=1) | -4.45539 | -0.55024 | 0.41093  |
| C(Fragment=1) | -4.71367 | -1.3403  | 1.55958  |
| C(Fragment=1) | -5.99021 | -1.90431 | 1.73667  |
| C(Fragment=1) | -7.01268 | -1.58027 | 0.86999  |
| C(Fragment=1) | -6.76428 | -0.80746 | -0.29232 |
| C(Fragment=1) | -8.43977 | -2.11293 | 1.08363  |
| C(Fragment=1) | -9.50835 | -1.44809 | 0.58495  |
| C(Fragment=1) | -9.49705 | 0.08421  | 0.36378  |

|               |           |          |          |
|---------------|-----------|----------|----------|
| C(Fragment=1) | -10.4559  | 0.6218   | -0.48378 |
| C(Fragment=1) | -10.48031 | 1.99665  | -0.76552 |
| C(Fragment=1) | -9.5972   | 2.87248  | -0.13307 |
| C(Fragment=1) | -8.64597  | 2.36163  | 0.76425  |
| C(Fragment=1) | -8.55513  | 0.95984  | 0.98668  |
| O(Fragment=1) | -9.76287  | 4.29733  | -0.38887 |
| C(Fragment=1) | -8.62681  | 5.07815  | 0.03967  |
| N(Fragment=1) | -3.11342  | 0.02395  | 0.2268   |
| O(Fragment=1) | -2.21186  | -0.75399 | 0.84232  |
| O(Fragment=1) | -2.81953  | 0.03821  | -1.08582 |
| C(Fragment=1) | -8.62017  | -3.49448 | 1.79749  |
| N(Fragment=1) | -8.77195  | -4.65678 | 2.39805  |
| H(Fragment=1) | -5.25486  | 0.19486  | -1.44391 |
| H(Fragment=1) | -3.9518   | -1.5376  | 2.26833  |
| H(Fragment=1) | -6.16437  | -2.59577 | 2.52037  |
| H(Fragment=1) | -7.54173  | -0.63269 | -1.02008 |
| H(Fragment=1) | -10.37186 | -2.02994 | 0.31435  |
| H(Fragment=1) | -11.18911 | -0.01056 | -0.9403  |
| H(Fragment=1) | -11.18389 | 2.38747  | -1.46766 |
| H(Fragment=1) | -7.98206  | 3.04373  | 1.28349  |
| H(Fragment=1) | -7.7868   | 0.58523  | 1.62604  |
| H(Fragment=1) | -8.74123  | 6.07211  | -0.33161 |
| H(Fragment=1) | -8.60742  | 5.07453  | 1.09487  |
| H(Fragment=1) | -7.71676  | 4.66633  | -0.34325 |
| C(Fragment=2) | 3.35559   | 0.46284  | -0.1801  |
| C(Fragment=2) | 4.66273   | 0.43351  | 0.27319  |
| C(Fragment=2) | 5.53413   | -0.57737 | -0.10166 |
| C(Fragment=2) | 5.13703   | -1.49952 | -1.10447 |
| C(Fragment=2) | 3.79521   | -1.51382 | -1.53434 |
| C(Fragment=2) | 2.91145   | -0.54444 | -1.03294 |
| I(Fragment=2) | 0.89406   | -0.58874 | -1.56111 |
| C(Fragment=2) | 9.14203   | 0.56205  | 0.77881  |

|               |          |          |          |
|---------------|----------|----------|----------|
| C(Fragment=2) | 9.79793  | 1.78239  | 0.50158  |
| C(Fragment=2) | 9.86933  | -0.58855 | 0.98908  |
| C(Fragment=2) | 11.1933  | 1.84884  | 0.69801  |
| H(Fragment=2) | 9.2533   | 2.65277  | 0.17759  |
| C(Fragment=2) | 11.24315 | -0.53113 | 1.11831  |
| H(Fragment=2) | 9.35834  | -1.52483 | 1.06034  |
| C(Fragment=2) | 11.89199 | 0.6983   | 1.08819  |
| H(Fragment=2) | 11.71905 | 2.77732  | 0.58073  |
| H(Fragment=2) | 11.79326 | -1.42299 | 1.26843  |
| O(Fragment=2) | 13.26854 | 0.77744  | 1.48639  |
| C(Fragment=2) | 14.11133 | 0.63955  | 0.36185  |
| H(Fragment=2) | 13.89613 | 1.42924  | -0.30825 |
| H(Fragment=2) | 15.12863 | 0.69452  | 0.68179  |
| H(Fragment=2) | 13.92558 | -0.30208 | -0.09045 |
| F(Fragment=2) | 5.10258  | 1.39209  | 1.09066  |
| N(Fragment=2) | 6.83453  | -0.63795 | 0.61689  |
| N(Fragment=2) | 7.68744  | 0.45486  | 0.94056  |
| F(Fragment=2) | 6.0121   | -2.37448 | -1.63338 |
| H(Fragment=2) | 2.68417  | 1.25274  | 0.13539  |
| H(Fragment=2) | 3.44038  | -2.25864 | -2.24131 |

#### References:

- S1. Gupta, R. K.; Pathak, S. K.; De, J.; Pal, S. K.; Achalkumar, A. S.; *J. Mater. Chem. C*, **2018**, *6*, 1844-1852
- S2. Saccone, M.; Spengler, M.; Pfletscher, M.; Kuntze, K.; Virkki, M.; Wölper, C.; Gehrke, R.; Jansen, G.; Metrangolo, P.; Priimagi, A.; Giese, M.; *Chem. Mater.*, **2019**, *31*, 462-470.
- S3. Bruce, D. W.; Metrangolo, P.; Meyer, F.; Pilati, T.; Präsang, C.; Resnati, G.; Terraneo, G.; Wainwright, S. G.; Whitwood, A. C.; *Chem. - Eur. J.*, **2010**, *16* (31), 9511-9524
- S4. L. A. Burns, M. S. Marshall, C. D. Sherrill; *J. Chem. Theory Comput.*, 2014, **10**, 49-57.
- S5. Book Chapter: "Counterpoise Correction and Basis Set Superposition Error" by C. David Sherrill, School of Chemistry and Biochemistry, Georgia Institute of Technology.  
(<http://vergil.chemistry.gatech.edu/notes/cp.pdf>)
